1           **Indisulam synergizes with palbociclib to induce senescence through inhibition of**  
2                                                           **CDK2 kinase activity**

3

4 Ziva Pogacar<sup>1</sup>, Jackie L. Johnson<sup>1</sup>, Lenno Krenning<sup>2</sup>, Giulia De Conti<sup>1</sup>, Cor Lieftink<sup>3</sup>, Arno  
5 Velds<sup>4</sup>, Leyma Wardak<sup>1</sup>, Fleur Jochems<sup>1</sup>, Kelvin Groot<sup>1</sup>, Arnout Schepers<sup>1</sup>, Liqin Wang<sup>1</sup>, Ji-  
6 Ying Song<sup>5</sup>, Marieke van de Ven<sup>6</sup>, Olaf van Tellingen<sup>7</sup>, Rene H. Medema<sup>2</sup>, Roderick L.  
7 Beijersbergen<sup>1,3</sup>, Rene Bernards<sup>1\*</sup> and Rodrigo Leite de Oliveira<sup>1,8\*</sup>

8

9 <sup>1</sup>Division of Molecular Carcinogenesis, Oncode Institute. The Netherlands Cancer Institute,  
10 Plesmanlaan 121, 1066 CX Amsterdam, The Netherlands.

11 <sup>3</sup>The NKI Robotics and Screening Center, The Netherlands Cancer Institute, Plesmanlaan  
12 121, 1066 CX Amsterdam, The Netherlands.

13 <sup>2</sup>Division of Cell Biology, Oncode Institute, The Netherlands Cancer Institute, Plesmanlaan  
14 121, 1066 CX Amsterdam, The Netherlands.

15 <sup>4</sup>Genomics core facility, The Netherlands Cancer Institute, Plesmanlaan 121, 1066 CX  
16 Amsterdam, The Netherlands.

17 <sup>5</sup>Division of Animal Pathology, The Netherlands Cancer Institute, Amsterdam, The  
18 Netherlands

19 <sup>6</sup>Mouse Clinic for Cancer and Aging, Netherlands Cancer Institute, Amsterdam, The  
20 Netherlands

21 <sup>7</sup>Division of Pharmacology. The Netherlands Cancer Institute, Plesmanlaan 121, 1066 CX  
22 Amsterdam, The Netherlands

23 <sup>8</sup>Present address: CRISPR Expertise Center, Cancer Center Amsterdam, Amsterdam  
24 University Medical Center, De Boelelaan 1117, 1081 HV Amsterdam, The Netherlands

25 \* Correspondence to René Bernards ([r.bernards@nki.nl](mailto:r.bernards@nki.nl)) and Rodrigo Leite de Oliveira  
26 ([r.ld.oliveira@amsterdamumc.nl](mailto:r.ld.oliveira@amsterdamumc.nl)).

27

28 **ABSTRACT**

29

30 Inducing senescence in cancer cells is emerging as a new therapeutic strategy. In order to  
31 find ways to enhance senescence induction by palbociclib, a CDK4/6 inhibitor approved for  
32 treatment of metastatic breast cancer, we performed functional genetic screens in  
33 palbociclib-resistant cells. Using this approach, we found that loss of *CDK2* results in strong  
34 senescence induction in palbociclib-treated cells. Treatment with the CDK2 inhibitor  
35 indisulam, which phenocopies genetic CDK2 inactivation, led to sustained senescence  
36 induction when combined with palbociclib in various cell lines and lung cancer xenografts.  
37 Treating cells with indisulam led to downregulation of cyclin H, which prevented CDK2  
38 activation. Combined treatment with palbociclib and indisulam induced a senescence  
39 program and sensitized cells to senolytic therapy. Our data indicate that inhibition of CDK2  
40 through indisulam treatment can enhance senescence induction by CDK4/6 inhibition.

41

42 **KEYWORDS**

43 CDK4/6 inhibitors, indisulam, senescence, combination treatment

44

## 45 INTRODUCTION

46

47 Cellular senescence is a stable cell cycle arrest and can be induced by a variety of  
48 stressors, including cancer therapies (referred to as therapy induced senescence [TIS]) [1].  
49 Senescence is characterized by changes in cellular physiology, such as changes of cell  
50 morphology, changes in gene expression and metabolism, and secretion of a variety of  
51 proteins (collectively referred to as the senescence associated secretory phenotype  
52 [SASP])[2]. Induction of senescence as an anti-cancer treatment can be advantageous in the  
53 short term because cell proliferation is halted and immune cells are recruited through the  
54 SASP. However, in the long term, persistence of senescent cancer cells can lead to chronic  
55 inflammation, tumor progression and migration[3]. We postulated that a “one-two punch”  
56 approach to cancer therapy, in which a first drug induces senescence and the second drug  
57 either targets the senescent cancer cells for death (senolysis) or enhances the efficacy of  
58 the immune infiltrate may be an effective anti-cancer strategy[4,5].

59

60 Several cancer treatments have been shown to induce senescence, including  
61 chemotherapeutics and targeted agents (reviewed in[6]. For instance, targeting CDK4 and 6  
62 with inhibitors (such as palbociclib, ribociclib and abemaciclib) induced senescence in  
63 various cancer models[7–11]. CDK4/6 are important kinases in the cell cycle, regulating the  
64 transition from G1 to S phase by phosphorylating and partially inactivating the  
65 retinoblastoma protein RB. Upon subsequent further phosphorylation of RB by CDK2, RB is  
66 functionally fully inactivated, leading to complete de-repression of E2F transcriptional activity  
67 and entry into S phase[12]. Since the majority of cancer cells have an intact *RB1* gene and  
68 thus depend on CDK4/6 kinase activity for sustained proliferation, CDK4/6 emerged as a  
69 potential target for cancer therapy. CDK4/6 inhibitors have been approved for treatment of  
70 hormone receptor positive (HR+) and human epidermal growth factor receptor 2 (HER2)  
71 negative (HER2-) breast cancer in combination with anti-hormonal therapy[13–15].

72

73 Due to the efficacy, safety and tolerability of the CDK4/6 inhibitors in HR+ breast cancer, and  
74 multiple nodes of oncogenic signals converging on CDK4/6 in multiple cancer types[16],  
75 there has been significant interest in extending their use to other cancer types. Several  
76 clinical trials using CDK4/6 inhibitors in various cancer types, such as non-small cell lung  
77 cancer, ovarian cancer and triple negative breast cancer were recently completed[17–20].  
78 However, translating the use of CDK4/6 inhibitors to other tumor types has proven to be  
79 challenging, due to limited senescence induction and intrinsic resistance[21–23]. Better  
80 understanding of the limitations of senescence induction by CDK4/6 inhibitors may help in  
81 broadening the clinical utility of this class of cancer therapeutics.

82

83 A potential solution is using CDK4/6 inhibitors in a rational combination. For example,  
84 combining CDK4/6 inhibitors with PI3K inhibition was effective in multiple preclinical  
85 models[24,25]. Furthermore, combining CDK4/6 inhibition with the MEK inhibitor trametinib  
86 was shown to increase senescence induction in lung cancer and colorectal cancer  
87 cells[26,27].

88

89 Indisulam was originally identified as a sulfonamide with anticancer effects. However, after  
90 various phase 1 and 2 clinical trials showed a response and stable disease in only 17-36%  
91 of patients, development was halted[28–34]. On a molecular level, indisulam was recently  
92 identified as being a molecular glue, targeting the splicing factor RBM39 to DCAF15, a  
93 component of a ubiquitin ligase complex, leading to degradation of RBM39[35]. Here, we  
94 identify an unexpected synergy between indisulam and palbociclib in induction of  
95 senescence in multiple cancer types. Moreover, we find that cancer cells made senescent  
96 with palbociclib and indisulam are sensitive to the senolytic agent ABT-263.

97

## 98 **RESULTS**

99 **CDK2 loss is synergistic with palbociclib in inducing senescence in triple negative**  
100 **breast cancer**

101

102 Palbociclib has only modest cytostatic activity in triple negative breast cancer (TNBC) cell  
103 lines (Supplemental Figure 1A). To capture the heterogeneity of TNBC, we chose three  
104 independent cell lines as models for kinome-based shRNA synthetic lethality screens to  
105 identify genes whose suppression enhances the response to palbociclib. We performed  
106 synthetic lethality screens in CAL-51, CAL-120 and HCC1806, all of which are resistant to  
107 palbociclib (Figure 1A, Supplemental Figure 1A). Depleted shRNAs were identified by deep  
108 sequencing as described previously[36]. When comparing the relative abundance of  
109 shRNAs in palbociclib-treated to untreated cells, shRNAs targeting *CDK2* were depleted in  
110 all three cell lines (Figure 1B). Furthermore, *CDK2* was the only common hit between all  
111 three screening cell lines. To validate this observation, we used individual shRNAs to knock  
112 down *CDK2* in the cell lines used for the screens (Supplemental Figure 1B). Even though  
113 *CDK2* knockdown had no effect on proliferation, we observed a decrease in proliferation in  
114 *CDK2* knockdown cells treated with palbociclib (Supplemental Figure 1C,D). Similarly, CAL-  
115 51-*CDK2* knockout cells had no changes in proliferation, but were more sensitive to  
116 palbociclib treatment (Figure 1C, D, E).

117

118 *CDK2* knockout cells treated with palbociclib showed a change in morphology indicative of  
119 senescence. To better characterize these cells, we stained them for senescence-associated  
120  $\beta$ -galactosidase (SA- $\beta$ -gal), an established marker of senescence[37]. We observed an  
121 increase in the number of cells positive for SA- $\beta$ -gal in all three TNBC cell lines when cells  
122 lacking *CDK2* were treated with palbociclib (Figure 1F, S1E).

123 Given that senescent cancer cells can promote inflammation and support metastasis,  
124 senolytic therapies are being developed to obliterate the senescent cells[6]. We tested the  
125 senolytic compound navitoclax (ABT-263, an inhibitor of BCL-2, BCL-xL and BCL-W) in  
126 *CDK2* knockout TNBC cells rendered senescent with palbociclib. After pre-treating sg*CDK2*  
127 and control cells with palbociclib, only cells lacking *CDK2* were killed upon treatment with  
128 ABT-263 (Figure 1G).

129

### 130 **CDK2 inhibition is synergistic with palbociclib in multiple cancer types**

131 Due to the heterogeneity of TNBC cell lines we hypothesized that the interaction between  
132 CDK2 and palbociclib may be a general dependency and could therefore be applied broadly  
133 to other cancer types. To address this, we tested an additional TNBC cell line (SUM159) as  
134 well as lung cancer cell lines A549 and H2122 and colorectal cancer cell lines DLD-1 and  
135 RKO. We knocked out *CDK2* (Figure 2A, E, S2A, C, E) and observed an increased  
136 sensitivity to palbociclib in cells harboring sgCDK2 compared to control cells (Figure 2B, C,  
137 F, G, S2B, D, F). Furthermore, cells harboring sgCDK2 treated with palbociclib showed an  
138 increased number of SA- $\beta$ -gal positive cells in SUM159 and A549 (Figure 2D, H) and the  
139 enlarged size and flat morphological features of cellular senescence. Unequivocal  
140 identification of senescence in cancer cells can be difficult due to the lack of gold-standard  
141 markers of the senescent state. Previous studies have identified gene signatures associated  
142 with senescence[2,38] or list of genes differentially expressed in senescence[39,40]. We  
143 therefore used transcriptome analyses to further characterize these cells. We observed that  
144 A549 cells showed enrichment in four out of five tested senescence signatures in RNA-seq  
145 experiments when comparing treated and untreated sgCDK2 cells (Figure 2I). This shows  
146 that senescence induction upon *CDK2* loss and CDK4/6 inhibition has little context-  
147 dependency.

148

### 149 **Indisulam phenocopies CDK2 loss and induces senescence in combination with** 150 **palbociclib**

151 Even though the interaction between *CDK2* loss and palbociclib induces senescence in a  
152 broad panel of cell lines, the lack of a selective CDK2 inhibitor complicates further  
153 development of this concept. While a variety of compounds targeting CDK2 are available,  
154 they tend to be non-specific and also target other CDKs, such as CDK1/5/7/9 (reviewed in  
155 [41]) which diminishes their utility. Furthermore, the off-target effects of these compounds  
156 often lead to toxicity and prevent their use in combination therapies. In search of a CDK2

157 inhibitor we came across indisulam, a sulfonamide that was described as an indirect CDK2  
158 inhibitor[42]. When we treated the cells with the combination of palbociclib and indisulam we  
159 observed a decrease in proliferation in all tested cell lines (Figure 3A, B, S3A, B).  
160 Furthermore, treatment with indisulam and palbociclib showed an increase in the number of  
161 cells positive for SA- $\beta$ -gal (Figure 3C, S3C). Both SUM159 and A549, as well as CAL-51  
162 senescent cells induced by palbociclib and indisulam were sensitive to ABT-263 (Figure 3D,  
163 S3D).

164

165 We then set out to further characterize the senescence phenotype by testing four different  
166 senescence markers by Western blot. We observed a decrease in phosphorylated RB and  
167 increase in p21 in both cell lines. There was also an increase in  $\gamma$ H2AX, although less  
168 apparent in A549. Furthermore, there was an increase in p16INK4A in SUM159. Since A549  
169 cells are p16 null, we examined an additional marker Lamin B1, which was reduced upon the  
170 combination treatment. We observed a reduction in CDK2 protein levels in palbociclib  
171 treated samples, however CDK2 was not further reduced upon the combination treatment  
172 samples (Figure 3E).

173

174 Next, we treated A549 and SUM159 cells with indisulam, palbociclib and the combination,  
175 and performed RNA-sequencing. We observed enrichment in senescence signatures when  
176 comparing the combination-treated cells to single drugs or untreated conditions (Figure 3F).  
177 Additionally, we tested the recently developed PF-0687360 compound, which is described to  
178 inhibit CDK2/4/6[43,44]. Treatment with PF-0687360 led to an increase of SA- $\beta$ -gal positive  
179 cells in SUM159 and A549 (Figure S3E) as well as enrichment in senescence signatures  
180 (Figure S3F), further validating inhibition of CDK2 with CDK4/6 as a senescence inducing  
181 combination.

182

183 **Combination of indisulam and palbociclib impairs tumor growth *in vivo***



184 To extend the findings to an *in vivo* model, we tested if *CDK2* loss leads to growth arrest  
185 when combined with palbociclib treatment in mice xenografts. We generated *CDK2* KO  
186 clones in A549 and CAL-51 cells and then engrafted A549 subcutaneously and CAL-51  
187 orthotopically in NMRI nude mice. However, *CDK2* seems to be essential for growth *in vivo*  
188 as the growth of *CDK2* knock-out tumors was severely impaired, making genetic validation  
189 technically not feasible (Figure S4A, B). We then proceeded to test the combination of  
190 palbociclib and indisulam *in vivo*. Firstly, we performed a PK/PD experiment and determined  
191 that both drugs were stable in plasma (Figure S4C, D). Next, we engrafted A549 cells  
192 subcutaneously and treated the mice with vehicle, palbociclib, indisulam or the combination.  
193 We observed a reduction in tumor growth in animals treated with the drug combination  
194 compared to the single treatments (Figure 4A). Furthermore, immunohistochemical analysis  
195 showed decrease of the proliferation marker Ki67 and increase of the CDK inhibitor p21 in  
196 tumors treated with the drug combination, compared to single treatments or control groups  
197 (Figure 4B, C). We conclude that the combination of indisulam and palbociclib is well  
198 tolerated *in vivo* and leads to impaired tumor growth and reduced proliferation.

199

#### 200 **Indisulam prevents activation of CDK2 leading to cell cycle arrest when combined** 201 **with palbociclib**

202 To better understand the effects of indisulam on CDK2 we first performed an *in vitro* kinase  
203 activity assay. In short, we added indisulam to different cyclin/CDK complexes *in vitro* and  
204 measured the kinase activity as previously described[45]. We did not observe a direct and  
205 specific inhibition of CDK2 by indisulam, which was in line with previous reports on indisulam  
206 being an indirect CDK2 inhibitor (Figure S5A). Recently, indisulam has been characterized  
207 as a molecular degrader, bringing together a splicing factor RBM39 with DCAF15 substrate  
208 receptor of CUL4a/b ubiquitin ligase complex[35]. This leads to ubiquitination and  
209 proteasomal degradation of RBM39, leading to accumulation of splicing errors. We therefore  
210 asked whether RBM39 degradation plays a role in the senescence induction by palbociclib  
211 and indisulam. Indeed, we observed a degradation of RBM39 in cells treated with indisulam

212 or the combination with palbociclib (Figure 5A). To understand if the combination effect of  
213 palbociclib and indisulam is dependent on RBM39 we used shRNAs to knock down RBM39.  
214 We observed that cells with reduced RBM39 expression and treated with palbociclib showed  
215 a reduction in growth (Figure 5B, C) and became positive for SA- $\beta$ -gal staining (Figure 5D).  
216 This suggests that the senescence induction upon indisulam and palbociclib treatment is  
217 mediated through RBM39 degradation.

218 To characterize splicing errors downstream of RBM39 degradation we treated A549 and  
219 SUM159 cells with indisulam, palbociclib or the combination and collected an RNA-seq data.  
220 Upon quantifying the splicing errors (see methods) we detected an increase of splicing  
221 errors in indisulam-treated and combination-treated cells with skipped exons being the most  
222 common splicing error class detected (Figure 5E).

223

224 To elucidate how indisulam-induced splicing errors affect CDK2 activity, we made use of a  
225 CDK2 reporter construct that changes its subcellular localization depending on CDK2  
226 activity[46]. Cells with low CDK2 activity show fluorescence in the nucleus and cells with  
227 active CDK2 show fluorescence in the cytoplasm. Upon 24 hours treatment with a matrix of  
228 increasing concentrations of indisulam, palbociclib and the combination we imaged fixed  
229 cells and determined the nuclear and cytoplasmic fluorescence signal, indicative of CDK2  
230 activity. We observed a decrease of CDK2 activity in cells treated with the combination of  
231 indisulam and palbociclib (Figure 5F). To exclude a potential confounding effect of cell cycle  
232 arrest leading to reduced CDK2 activity in the combination treatment, we performed a FACS-  
233 based experiment, where we did not observe cell cycle differences between the single  
234 treatments and the combination after 24h (Figure 5G). This indicates that CDK2 inactivation  
235 happens upstream of cell cycle arrest.

236

237 To investigate the dynamic of CDK2 inactivation upon treatment we performed a live imaging  
238 experiment using CDK2 reporter cells. We included a positive control, a CDK1/2 inhibitor  
239 SNS-032. After beginning the imaging, the drugs were added and cells were followed

240 through their next cell cycle. We first followed the cells that showed the fluorescence signal  
241 in the cytoplasm, indicative of active CDK2. We observed inactivation of CDK2 when we  
242 added SNS-032, but not the other drugs. Next, we followed the cells that showed  
243 fluorescence in the nucleus, and therefore had low activity of CDK2. We observed that  
244 treatments with SNS-032 and palbociclib prevented CDK2 activation, as expected.  
245 Remarkably, treatment with indisulam prevented CDK2 activation as well (Figure 5H).  
246  
247 When examining the effects of the combination treatment on the cell cycle proteins we  
248 observed a stronger reduction in phosphorylated RB in the combination treated cells (Figure  
249 5I). While levels of total CDK2 were only slightly reduced, the difference is likely in the levels  
250 of active CDK2. Additionally, Cyclin E levels were increased upon palbociclib treatment,  
251 which can be explained by reduced CDK2 activity regulating cyclin E levels[47,48]. We also  
252 observed a decrease in Cyclin H, a member of the CDK activating complex (CAK). CAK  
253 phosphorylates and activates CDK2 and we hypothesized that indisulam-induced  
254 downregulation of Cyclin H could lead to CDK2 inactivation. To this end, we tested the  
255 expression levels of *CCNH* upon treatment with indisulam using qPCR and observed a  
256 downregulation in both A549 and SUM159 cells (Figure 5J). Additionally, cells with  
257 knockdown of RBM39 also showed a reduction in *CCNH* (Figure 5K). This might indicate  
258 that indisulam-induced *CCNH* downregulation prevents CDK2 activation through the CAK  
259 complex. We then analyzed the RNA-seq data generated in Figure 5E by performing a  
260 kinase enrichment analysis[49]. Genes associated with CDK1 and CDK2 were over-  
261 represented in the list of differentially expressed genes in A549 and SUM159 cells treated  
262 with indisulam (Figure S5D). This further indicates that treatment with indisulam reduces the  
263 activity of CDK2. To confirm the effect of indisulam on CDK2, we overexpressed CDK2 in  
264 A549 cells using both transient transfection and stable integration of lentiviral vectors (Figure  
265 5L, M, S5B, C). We observed an increase in proliferation rescuing the senescence induction  
266 in cells that overexpressed CDK2 compared to control cells. Senescence induction was not  
267 fully rescued by CDK2 overexpression, which is in line with the observation that the activity

268 and not only abundance of CDK2 determine senescence induction. Taken together,  
269 indisulam downregulates *CCNH*, which prevents CDK2 activation and leads to senescence  
270 induction when combined with palbociclib.

271

## 272 **DISCUSSION**

273

274 Since proliferation of cancer cells depends heavily on the core components of the cell cycle  
275 machinery, inhibitors of CDKs could have significant anticancer activity in many tumor types.  
276 However, translating the success of CDK4/6 inhibitors from HR+ breast cancer to other  
277 cancer types has been hampered by intrinsic resistance[23,50]. Here we identify a treatment  
278 strategy that exploits the synergy between CDK2 loss (i.e., indisulam treatment) and  
279 palbociclib treatment in induction of senescence in a diverse panel of cell lines.

280

281 Genetic screens are a powerful tool to identify genetic dependencies in an unbiased  
282 manner[51]. Here, we identified *CDK2* loss as an enhancer of the palbociclib effect using  
283 genetic screens in three TNBC cell lines. We further validated this interaction in a diverse  
284 panel of cell lines, demonstrating that this synergy shows little context dependency. The  
285 interaction between *CDK2* loss and CDK4/6 inhibition is not surprising, as CDK2 acts  
286 downstream of CDK4/6 in the cell cycle progression. Furthermore, the majority of clinically  
287 relevant resistance mechanisms to CDK4/6 inhibition, such as loss of RB and  
288 overexpression of *CCNE*[20], could be circumvented by CDK2 inhibition. As such, *CDK2*  
289 depletion was previously shown to re-sensitize both CDK4/6 inhibitor sensitive and resistant  
290 cells[22,24,43,52,53].

291

292 Unfortunately, the lack of a specific CDK2 inhibitor has until now prevented exploiting the  
293 synergy between CDK2 inhibition and CDK4/6 inhibition. In spite of this, multiple targeting  
294 strategies were previously described to increase sensitivity to CDK4/6 inhibition, such as  
295 using a multi CDK inhibitor roscovitine[24], knock-in of analog-sensitive CDK2[22] and use of

296 triple CDK2/4/6 inhibitor PF-06873600[43,44]. Unfortunately, the use of roscovitine in the  
297 clinic is hindered by off-target effects and toxicity, and analog-sensitive CDK2 lacks  
298 translational potential. Even though PF-06873600 is in clinical development (phase 1 clinical  
299 trial ongoing: NCT03519178), the compound also inhibits CDK1, which might lead to toxicity  
300 as seen with other multi-CDK inhibitors[43]. Interestingly, comparing palbociclib to two other  
301 CDK4/6 inhibitors abemaciclib and ribociclib shows that abemaciclib is more effective  
302 compared to palbociclib and ribociclib, possibly due to the notion that it also targets  
303 CDK2[45]. However, both intrinsic and acquired resistance are still an issue, indicating a  
304 need for a different therapeutic strategy. We propose using the indirect CDK2 inhibitor  
305 indisulam, which has previously shown a favorable toxicity profile in the clinic. We  
306 demonstrate that combination of palbociclib and indisulam induces senescence in a diverse  
307 cell line panel, which points to a broad applicability across tumor types. Additionally, our  
308 preliminary data indicate that the combination can be effective in vivo.

309

310 Even though indisulam was described as an indirect CDK2 inhibitor, later studies revealed  
311 that it targeted a splicing factor—RBM39—for degradation. Interestingly, we observed an  
312 effect of indisulam on CDK2 activity only in cells where CDK2 is initially inactive, indicating  
313 that indisulam prevents CDK2 activation. Regulation of CDK2 activity is based on its  
314 interaction with cyclins, removal of inhibitory phosphorylation by CDC25 and activating  
315 phosphorylation by the CDK Activating Kinase (CAK) complex. We observed that cyclin H,  
316 which is a part of the CAK complex, is downregulated upon indisulam treatment in an  
317 RBM39 dependent manner. As we observed no splicing errors in *CCNH* transcripts or other  
318 CDK2 regulators, it is still unclear how reduction of RBM39 leads to *CCNH* downregulation.  
319 As *CCNH* is an essential gene, loss of function genetic experiments are technically  
320 challenging to perform. Additionally, other CDKs might be involved in senescence induction  
321 through indisulam since CAK regulates CDK1,4 and 6 in addition to CDK2. Furthermore, as  
322 activity and not amount of CDK2 seems to play a role in indisulam sensitivity,

323 overexpression of CDK2 is at best expected to partially rescue the senescence induction,  
324 which is indeed what we observed here.

325

326 Combining palbociclib with indisulam might be a potential treatment strategy for cell types  
327 that are intrinsically resistant to palbociclib. In addition, acquired resistance to palbociclib has  
328 been shown to be reversed by depleting CDK2. For example, loss of RB leads to resistance  
329 to palbociclib and the combination of palbociclib with a MEK inhibition[26]. However, RB  
330 deficient cells are still sensitive to knockdown of CDK2[53]. It is therefore likely that the  
331 combination of palbociclib and indisulam would still be effective in palbociclib resistant cells,  
332 although the mechanism of senescence induction in RB deficient cells is not yet well  
333 understood. Furthermore, recent reports on Cyclin D regulation described *AMBRA1* loss as  
334 a resistance mechanism to CDK4/6 inhibition,[54] but as those cells still depend on CDK2  
335 activity, combination with indisulam could still be effective. Senescence induction is  
336 increasingly in focus as a potential cancer therapeutic strategy, supported by the findings  
337 that senolytic compounds can be effective in eradicating senescent cancer cells[6]. Here, we  
338 have shown that senescence induction by palbociclib and indisulam sensitizes the cells to  
339 the established senolytic drug navitoclax. Finally, senescent cells attract immune cells, and  
340 together with the notion that indisulam induced splicing errors could lead to generation of  
341 neoantigens, the combination of senescence induction and immunotherapy might be a  
342 potential future treatment strategy[26,55].

343

#### 344 **ACKNOWLEDGEMENTS**

345 We would like to thank Artur Burylo, Natalie Proost, Jordi van Iersel and Marcio Sousa for  
346 help with experiments and Katrien Berns for critical discussion on screening techniques. We  
347 also thank the NKI Bioimaging facility, Genomics core facility and pre-Clinical Intervention  
348 Unit for their technical support. This work was supported by grants from the European  
349 Research Council (ERC) to R.B. and the Dutch Cancer Society through the Oncode Institute.

350

351 **AUTHOR CONTRIBUTIONS**

352 Conceptualization, Z.P, J.L.J, R.B and R.L.O.; Methodology, L.K.; Software C.L., A.V. and  
353 K.G.; Validation, Z.P. and R.L.O.; Formal analysis, Z.P., G.D.C., C.L., A.V., K.G., Le. W.,  
354 F.J., J.Y.S. and R.L.O.; Investigation, Z.P., J.L.J., L.K., G.D.C., Le.W., F.J., K.G., A.S., Li.W.,  
355 J.Y.S. and R.L.O.; Data curation, C.L. and A.V.; Writing - Original Draft, Z.P., R.B. and  
356 R.L.O.; Writing - Review and Editing, J.L.J., F.J., A.S., Li.W., O.vT. and R.L.B.; Visualization,  
357 Z.P., L.K., G.D.C., C.L., A.V., Le.W., F.J., K.G. and R.L.O.; Supervision, M.vdV., O.vT.,  
358 R.H.M., R.L.B. and R.B.; Funding Acquisition, R.H.M and R.B.

359

360 **DECLARATION OF INTEREST**

361 R.B is the founder of the company Oncosence (<https://www.oncosence.com>), which aims to  
362 develop senescence-inducing and senolytic compounds to treat cancer.

363

364 **LEGENDS**

365 **Figure 1: CKD2 loss is synergistic with palbociclib in induction of senescence in triple**  
366 **negative breast cancer**

367

368 **A** Volcano plot of hit selection. shRNA counts of CAL-51, CAL-120 and HCC1806 were  
369 compared between palbociclib treated and untreated conditions. Each dot represents an  
370 individual shRNA. Y axis shows the false discovery rate (FDR) and X axis shows fold  
371 change between conditions. The cutoffs of 0.1 FDR and -1 log<sub>2</sub> fold change are represented  
372 by the dashed lines. Red dots indicate shRNAs targeting CDK2. Hits were selected as genes  
373 that were represented with at least 2 independent shRNAs.

374 **B** Venn diagram shows overlap of hits between CAL-51, CAL-120 and HCC-1806. Hits were  
375 selected as genes that were represented with at least 2 independent shRNAs.

376 **C-F** Screen validation: CDK2 was knocked out with two independent sgRNAs in CAL-51  
377 cells.

378 **C** Western blot analysis of CDK2 levels in CAL-51 sgCDK2 and control cells. Tubulin was  
379 used as loading control (n=2).

380 **D** Long term colony formation assay of CAL-51. Wild-type, control and sgCDK2 cells were  
381 treated with indicated doses of palbociclib for 10 days (n=3).

382 **E** Proliferation assay of CAL-51. Cells were treated with 0.5  $\mu$ M of palbociclib or DMSO.  
383 Mean of three technical replicates (n=2) is shown and error bars indicate standard deviation.  
384 The end point confluency of all conditions were analysed using two-way ANOVA with Šidák's  
385 post-hoc test (\*\* p< 0.01 \*\*\*\* p< 0.0001).

386 **F** SA- $\beta$ -gal staining in CAL-51 cells treated for 10 days with 0.5  $\mu$ M of palbociclib. Scale bar  
387 indicates 100  $\mu$ m (n=2).

388 **G** Proliferation assay of CTRL or CAL-51 sgCDK2 cells treated with senolytic drug ABT-263.  
389 Cells were pre-treated with 2  $\mu$ M of palbociclib for 10 days to induce senescence, then  
390 seeded in high density (100% confluence) and treated with palbociclib or a combination of  
391 palbociclib and 5  $\mu$ M ABT-263. Proliferating cells, which were not pre-treated, were seeded  
392 at low density and treated with DMSO or ABT-263. Mean of three technical replicates is  
393 shown and error bars indicate standard deviation (n=2).

394

395 **Figure 2: CDK2 inhibition is synergistic with palbociclib in multiple cancer types**

396

397 **A-D** CDK2 was knocked out in SUM159 cells using two independent sgRNAs.

398 **A** Western blot analysis of SUM159 sgCDK2 cells and control cells. Tubulin was used as a  
399 loading control (n=2).

400 **B** Long term colony formation assay of SUM159 sgCDK2 and control cells with palbociclib  
401 was performed for 8 days (n=2).

402 **C** Proliferation assay of SUM159 sgCDK2 and control cells treated with 0.25  $\mu$ M of  
403 palbociclib. Mean of three technical replicates (n=2) is shown and error bars indicate  
404 standard deviation. The end point confluency of all conditions were analysed using two-way  
405 ANOVA with Šidák's post-hoc test (\*\*\*\* p< 0.0001).



406 **D** SA- $\beta$ -gal staining in SUM159 sgCDK2 and control cells treated with 0.25  $\mu$ M of palbociclib  
407 for 8 days. Scale bar indicates 100  $\mu$ m (n=2).

408 **E-H** CDK2 was knocked out in A549 and two single cell clones were selected.

409 **E** Western blot analysis of A549 sgCDK2 cells and control cells. Tubulin was used as a  
410 loading control (n=2).

411 **F** Long term colony formation assay of A549 sgCDK2 and control cells with palbociclib was  
412 performed for 10 days (n=2).

413 **G** Proliferation assay of A549 sgCDK2 and control cells treated with 0.5  $\mu$ M of palbociclib.  
414 Mean of three technical replicates (n=2) is shown and error bars indicate standard deviation.  
415 The end point confluency of all conditions were analysed using two-way ANOVA with Šidák's  
416 post-hoc test (\*\*\*\* p< 0.0001).

417

418 **H** SA- $\beta$ -gal staining in A549 sgCDK2 and control cells treated with 0.5  $\mu$ M of palbociclib for  
419 10 days. Scale bar indicates 100  $\mu$ m (n=2).

420 **I** GSEA of previously published senescence gene sets comparing A549 sgCDK2 cells  
421 treated with 2  $\mu$ M palbociclib for 10 days with untreated cells. Normalized enrichment score  
422 (NES) and p-values of enrichment score are shown. The experiment was performed in  
423 duplicates.

424

425 **Figure 3: Indisulam phenocopies CDK2 loss and induces senescence in combination**  
426 **with palbociclib**

427

428 **A** Long term colony formation assay of SUM159 and A549 cells treated with palbociclib,  
429 indisulam and the combination for 10 days (n=3).

430 **B** Proliferation assay of SUM159 and A549 cells treated with palbociclib, indisulam and the  
431 combination. SUM159 cells were treated with 0.5  $\mu$ M of palbociclib and 2  $\mu$ M indisulam and  
432 A549 with 2  $\mu$ M palbociclib and 0.5  $\mu$ M indisulam. Mean of three technical replicates (n=2) is

433 shown and error bars indicate standard deviation. The end point confluency of all conditions  
434 were analysed using one-way ANOVA with Dunnett's post-hoc test (\*\*\*\*  $p < 0.0001$ ).

435 **C** SA- $\beta$ -gal staining in SUM159 and A549 cells treated with palbociclib, indisulam and  
436 combination. SUM159 were treated with 0.5  $\mu$ M of palbociclib and 2  $\mu$ M indisulam and A549  
437 with 2  $\mu$ M palbociclib and 0.5  $\mu$ M indisulam for 10 days. Scale bar indicates 100  $\mu$ m (n=3).

438 **D** Long term colony formation assay of SUM159 and A549 cells pre-treated with 0.5  $\mu$ M of  
439 palbociclib plus 2  $\mu$ M of indisulam for SUM159 and 2  $\mu$ M of palbociclib plus 0.5  $\mu$ M of  
440 indisulam for A549 for 2 weeks. Senescent and parental cells were then treated with 0.5  $\mu$ M  
441 and 2  $\mu$ M of ABT-263 for 1 week (n=2).

442 **E** Western blot analysis of SUM159 and A549 cells treated with palbociclib, indisulam and  
443 combination. SUM159 were treated with 0.5  $\mu$ M of palbociclib and 2  $\mu$ M indisulam and A549  
444 with 2  $\mu$ M palbociclib and 0.5  $\mu$ M indisulam for 10 days. HSP90 and vinculin were used as a  
445 loading control (n=2).

446 **F** GSEA of previously published senescence gene sets comparing A549 and SUM159 cells  
447 treated with palbociclib, indisulam or the combination. SUM159 were treated with 0.5  $\mu$ M of  
448 palbociclib and 2  $\mu$ M indisulam and A549 with 2  $\mu$ M palbociclib and 0.5  $\mu$ M indisulam for 10  
449 days. Comparisons of normalized enrichment scores of combination with untreated, and  
450 combination with single drugs is shown. Numbers indicate p-value (\* $p < 0.05$ ; \*\* $p < 0.01$ ;  
451 \*\*\* $p < 0.001$ ).

452

453 **Figure 4: Combination of indisulam and palbociclib impairs tumor growth *in vivo***

454

455 **A** Tumor growth of A549 xenografts in NMRI nude mice. Upon tumors reaching 200 mm<sup>3</sup> the  
456 mice were randomly assigned to treatment with vehicle, indisulam, palbociclib or  
457 combination. Palbociclib was administered by oral gavage daily at 100 mg/kg and indisulam  
458 by intraperitoneal injection three times per week at 5 mg/kg. Every group consisted of 8-12  
459 mice. Error bars indicate SEM. Tumor volumes of palbociclib and combination treated mice  
460 at end point were analysed using unpaired t-test (\* $p < 0.05$ ).

461 **B** Quantification of IHC staining for Ki67 and p21 of A549 tumor xenografts (n= 8-12).  
462 Positive area of the tumor was quantified in tumors treated with vehicle, palbociclib,  
463 indisulam or combination. One-way ANOVA was performed with Dunnett's post-hoc test  
464 (\*p<0.05; \*\*\*p<0.001; \*\*\*\*p<0.0001). For the Ki67 staining, combination is compared to  
465 vehicle or single treatments.

466 **C** Representative images from (B) of IHC staining for Ki67 and p21 of A549 tumor  
467 xenografts treated with vehicle, palbociclib, indisulam or combination. Images were taken at  
468 20x magnification and the scale bar indicates 50  $\mu$ m.

469

470 **Figure 5: Indisulam prevents activation of CDK2 leading to cell cycle arrest when**  
471 **combined with palbociclib**

472

473 **A** Western blot analysis of RBM39 in SUM159 and A549 cells treated with palbociclib,  
474 indisulam or combination. SUM159 were treated with 0.5  $\mu$ M of palbociclib and 2  $\mu$ M  
475 indisulam and A549 with 2  $\mu$ M palbociclib and 0.5  $\mu$ M indisulam for 12 days. Vinculin was  
476 used as a loading control (n=3).

477 **B-D** RBM39 was knocked-down in SUM159 cells with two independent shRNAs.

478 **B** qPCR analysis of RBM39 normalized to housekeeping gene RPL13 in SUM159. Mean of  
479 three technical replicates is shown and error bars indicate standard deviation.

480 **C** Proliferation assay was performed in RBM39 knock-down and control SUM159 using 0.25  
481  $\mu$ M of palbociclib. Mean of three technical replicates is shown and error bars indicate  
482 standard deviation. The end point confluency of all conditions were analysed using two-way  
483 ANOVA with Šidák's post-hoc test (\*\*\*\* p< 0.0001).

484 **D** SA- $\beta$ -gal staining in RBM39 knock-down and control SUM159 cells treated with 0.125  $\mu$ M  
485 of palbociclib for 10 days. Scale bar indicates 100  $\mu$ m (n=2).

486 **E** Quantification of splicing errors in RNA-sequencing data in A549 and SUM159 cells  
487 treated for 16h with 2  $\mu$ M palbociclib, 3  $\mu$ M indisulam and the combination, in technical  
488 duplicates. Bars represent counts compared to untreated samples.

489 **F** A549 cells expressing a CDK2 reporter DHB-iRFP and H2B-GFP were treated with a  
490 matrix of different concentrations of palbociclib (2-5  $\mu$ M) and indisulam (2-40  $\mu$ M). After 24h,  
491 CDK2 reporter localization and nuclei were imaged by spinning disk microscopy, and the  
492 nucleo/cytoplasmic distribution of the CDK2 reporter was analyzed using ImageJ. Matrix  
493 shows the average CDK2 reporter ratio (n=2).

494 **G** Flow cytometry analysis of A549 cells treated with 5  $\mu$ M of palbociclib, 40  $\mu$ M of indisulam  
495 or combination for 24h. Mean of three technical replicates is shown and error bars represent  
496 standard deviation. Unpaired t-test was performed (\*p<0.05; \*\*p<0.01) (n=2).

497 **H** A549 cells expressing CDK2 reporter DHB-iRFP and H2B-GFP were treated with 10  $\mu$ M of  
498 SNS-032, 40  $\mu$ M of indisulam or 5  $\mu$ M palbociclib and immediately imaged for 24h. CDK2  
499 activity was quantified in cells with initial high CDK2 activity (left plot) and cells with initial low  
500 CDK2 activity (right plot). At least 10 cells per condition were quantified and results show the  
501 mean of two biological replicates. Error bars indicate standard deviation (n=2).

502 **I** Western blot analysis of A549 and SUM159 cells treated with 2  $\mu$ M palbociclib, 5  $\mu$ M  
503 indisulam and the combination for either 24 or 48 hours. HSP90 was used as a loading  
504 control (n=3).

505 **J** qPCR analysis of A549 and SUM159 cells treated with 3  $\mu$ M of indisulam for 24h. CCNH  
506 expression was normalized to the housekeeping gene RPL13. Mean of three technical  
507 replicates is shown and error bars indicate standard deviation.

508 **K** qPCR analysis of SUM159 cells harbouring shRBM39 or control cells for CCNH (as in B).  
509 Expression was normalised to the housekeeping gene RPL13. Mean of three technical  
510 replicates is shown and error bars indicate standard deviation.

511 **L** qPCR analysis of CDK2 overexpressing A549 cells compared to GFP control cells.  
512 Expression was normalized to the housekeeping gene RPL13. Mean of three technical  
513 replicates is shown and error bars indicate standard deviation.

514 **M** Long term colony formation assay of CDK2 and GFP overexpressing A549 cells treated  
515 with 0.5  $\mu$ M palbociclib, 0.5  $\mu$ M indisulam and the combination for 10 days.

516

517 **SUPPLEMENTAL FIGURE LEGENDS**

518 **Supplemental Figure 1**

519 **A** Schematic outline of dropout screens. Triple negative breast cancer cell lines CAL-51,  
520 CAL-120 and HCC1806 were infected with a shRNA library targeting kinome and cultured in  
521 presence or absence of palbociclib. After 8 - 10 population doublings, shRNA sequences  
522 were amplified and quantified using next generation sequencing.

523 **B-E** CDK2 was knocked down in CAL-51, CAL-120 and HCC1806 using two independent  
524 shRNAs.

525 **B** qPCR analysis of CDK2 normalized against expression of housekeeping gene RPL13.  
526 Mean of three technical replicates is shown and error bars indicate standard deviation.

527 **C** Long term colony formation assay with palbociclib was performed for 10 days (n=3).

528 **D** Proliferation assay was performed using 0.5  $\mu$ M of palbociclib for CAL-51 and CAL-120  
529 and 2  $\mu$ M for HCC1806. Mean of three technical replicates (n=2) is shown and error bars  
530 indicate standard deviation. The end point confluency of all conditions were analysed using  
531 two-way ANOVA with Šidák's post-hoc test (\*\* p< 0.01, \*\*\*\* p< 0.0001)

532 **E** SA- $\beta$ -gal staining in CAL-51, CAL-120 and HCC1806 CDK2 KD and control cells treated  
533 for 10 days with 0.5  $\mu$ M of palbociclib. Scale bar indicates 100  $\mu$ m (n=2).

534

535 **Supplemental Figure 2**

536 **A-C** CDK2 was knocked out in DLD-1, RKO and H2122 cells using two independent  
537 sgRNAs.

538 **A** Western blot analysis of CDK2 knock-out DLD-1, RKO and H2122 cells and control cells.  
539 Tubulin was used as a loading control. An arrow depicts the CDK2 band in H2122 (n=2).

540 **B** Long term colony formation assay of DLD-1, RKO and H2122 sgCDK2 and control cells  
541 with palbociclib was performed for 10 days (n=2).

542 **C** Long term colony formation assay of control and SUM159 sgCDK2 cells pre-treated with 2  
543  $\mu$ M palbociclib for 2 weeks, and then treated with 0.5  $\mu$ M ABT-263 for 1 week (n=2).

544

545 **Supplemental Figure 3**

546 **A** Long term colony formation assay of CAL-51, DLD-1, RKO and H2122 cell lines treated  
547 with palbociclib, indisulam and the combination for 10 days (n=2).

548 **B** Proliferation assay of CAL-51, DLD-1, RKO and H2122 cell lines treated with palbociclib,  
549 indisulam and the combination. CAL-51 were treated with 1  $\mu$ M of palbociclib and 1  $\mu$ M  
550 indisulam, DLD-1 with 0.5  $\mu$ M of palbociclib and 1  $\mu$ M indisulam, RKO with 2  $\mu$ M of  
551 palbociclib and 1  $\mu$ M indisulam and H2122 with 1  $\mu$ M palbociclib and 0.5  $\mu$ M indisulam.  
552 Mean of three technical replicates (n=2) is shown and error bars indicate standard deviation.  
553 The end point confluency of all conditions were analysed using one-way ANOVA with  
554 Dunnett's post-hoc test.\*\*\*\* p< 0.0001

555 **C** SA- $\beta$ -gal staining in CAL-51, DLD-1, RKO and H2122 cell lines treated with palbociclib,  
556 indisulam and the combination using the same doses as in B. Scale bar indicates 100  $\mu$ m  
557 (n=2).

558 **D** Long term colony formation assay of CAL-51 cells pre-treated with 1  $\mu$ M of palbociclib and  
559 1  $\mu$ M of indisulam for 2 weeks. Senescent and parental cells were then treated with 0.5  $\mu$ M  
560 and 2  $\mu$ M of ABT-263 for 1 week (n=2).

561 **E** SA- $\beta$ -gal staining in A549 and SUM159 cell lines treated with 0.5  $\mu$ M PF-06873600 for one  
562 week (n=2).

563 **F** GSEA of previously published senescence gene sets comparing A549 and SUM159 cells  
564 treated with 0.5  $\mu$ M PF-06873600 for one week with untreated cells. Normalized enrichment  
565 score (NES) and p-values of enrichment score are shown. The experiment was performed in  
566 duplicates.

567

568 **Supplemental Figure 4**

569 **A** Tumor growth of CAL-51CDK2 single cell knock-out clone and control xenografts in mice.  
570 One million cells were injected orthotopically in the 4<sup>th</sup> right mammary fat pad of female  
571 NMR1 nude mice, 5-6 mice per group.

572 **B** Tumor growth of two A549 CDK2 single cell knock-out clones and control xenografts in  
573 mice. One million cells were injected subcutaneously in the right flank of NMRI nude mice, 5-  
574 6 mice per group.

575 **C, D** Pharmacokinetic studies of palbociclib and indisulam in A549-tumor bearing mice.  
576 A549 cells were injected subcutaneously in NMRI nude mice. After tumour establishment  
577 (~200 mm<sup>3</sup>), mice were treated with palbociclib, indisulam or combination. Blood was  
578 collected 2, 4, 8 and 24h after drug treatment from 6 male and 6 female mice. The drug  
579 concentrations in the blood were determined by mass spectrometry.

580 **C** Palbociclib blood concentration is displayed from every mouse that received the single  
581 drug treatment (left) and the combination with indisulam (right).

582 **D** indisulam blood concentration is displayed from every mouse that received the single drug  
583 treatment (left) and the combination with palbociclib (right).

584

#### 585 **Supplemental Figure 5**

586 **A** In vitro kinase inhibition assay of indisulam for CDK/cyclin complexes. IC<sub>50</sub> values are  
587 shown in triplicates with error bars indicating standard deviation.

588 **B** qPCR analysis of A549 cells transfected with CMV-CDK2 and CMV-GFP vectors.  
589 Expression was normalized to the housekeeping gene RPL13. Mean of three technical  
590 replicates is shown and error bars indicate standard deviation.

591 **C** Long term colony formation assay of A549 cells transfected with CMV-CDK2 and CMV-  
592 GFP vectors treated with 0.5 μM palbociclib, 0.5 μM indisulam and the combination for 10  
593 days.

594 **D** Kinase enrichment analysis (KEA) on RNA-seq data in A549 and SUM159 cells treated  
595 with 3 μM indisulam for 16h compared to untreated. Filtered for adjusted p-value <0.05.  
596 CDK1 and CDK2 are highlighted.

597

#### 598 **Materials availability**

599 Plasmid generated in this study is available from the corresponding authors upon request.

600 **Data and Code availability**

601 Raw RNA-sequencing data will be available in GEO upon acceptance of the manuscript.

602

603 **METHODS**

604

605 **Cell lines**

606 TNBC cell line CAL-51 was grown in DMEM (Gibco) supplemented with 20% fetal bovine  
607 serum (FBS, Serana), 1% penicillin-streptomycin (P/S, Gibco) and 2mM L-glutamine  
608 (Gibco). TNBC cell line CAL-120 was grown in DMEM supplemented with 10% FBS, 1%  
609 P/S and 2 mM L-glutamine. TNBC cell line HCC1806, lung cancer cell lines A549 and  
610 H2122, colon cancer cell lines DLD-1 and RKO were grown in RPMI (Gibco) supplemented  
611 with 10% FBS, 1% P/S and 2 mM L-glutamine. TNBC cell line SUM159 was grown in  
612 DMEM/F12 (Gibco) supplemented with 10% FBS, 1% P/S, 5 µg/ml insulin (Sigma-Aldrich)  
613 and 1µg/ml hydrocortisone (Sigma-Aldrich).  
614 HCC1806, A549, RKO, H2122 and DLD-1 were purchased from ATCC. SUM159 was a gift  
615 from Metello Innocenti (NKI, Amsterdam). CAL-51 and CAL-120 were obtained from DSMZ.  
616 All cell lines were regularly tested for mycoplasma contamination using a PCR assay and  
617 STR profiled (Eurofins).

618

619 **Compounds and antibodies**

620 Palbociclib, indisulam and ABT-263 were purchased from MedKoo (Cat:#123215, #201540  
621 and #201970). PF-06873600 was purchased from Selleck chem. Antibodies against CDK2  
622 and tubulin were purchased from Abcam. Antibodies against vinculin and p-H2AX S139  
623 were purchased from Sigma Aldrich. Antibodies against p-RB S780, p-RB S795, RB (9309-  
624 4H1), Lamin B1, Cyclin H and Cyclin E were purchased from Cell Signalling Technology.  
625 Antibodies against HSP90 and p21 were purchased from Santa Cruz Biotechnology.  
626 Antibody against RBM39 was purchased from Atlas Antibodies. Antibody against p16 was  
627 purchased from Proteintech.



628

### 629 **Kinome dropout shRNA screens**

630 TNBC cell lines CAL-51, CAL-120 and HCC1806 were screened using a kinome shRNA  
631 library targeting 518 human kinases and 17 kinase-related genes. The kinome library was  
632 assembled from the RNAi Consortium (TRCHs 1.5 and 2.0) shRNA collection and included  
633 243 hairpins targeting essential and 272 targeting non-essential genes. Upon generating  
634 lentiviral shRNA vectors, CAL-51, CAL-120 and HCC1806 cells were infected using a low  
635 infection efficiency of <30%, reference sample t=0 was collected and cells were then  
636 cultured in the presence or absence of palbociclib (0.4  $\mu$ M for CAL-51, 1  $\mu$ M for CAL-120  
637 and 0.2  $\mu$ M for HCC1806), while maintaining 1000x coverage of the library. shRNA  
638 sequences were then recovered by PCR from genomic DNA, and the abundance was  
639 quantified by deep sequencing. The analysis was performed using DESeq[56]. Hit selection  
640 was done in two steps: initially the hits were selected based on the comparison of treated to  
641 untreated arm with the criteria of at least two shRNAs per gene with log2 fold change <-1,  
642 FDR <0.1 and baseMeanA > 100 and no hit shRNAs in the opposite direction. To exclude  
643 the shRNAs that are increased in the untreated condition, instead of decreased in treated  
644 compared to reference t=0 sample, we performed an additional selection step in which  
645 sgRNA should have log2 fold change < -1 in treated condition compared to reference t=0  
646 condition. Hits that overlapped between the three cell lines were prioritized for validation.

647

### 648 **Plasmids**

649 The lentiviral shRNA vectors were selected from the arrayed TRC human genome-wide  
650 shRNA collection in pLKO backbone. shRNA targeting CDK2 #1:  
651 CTATGCCTGATTACAAGCCAA, shRNA targeting CDK2 #2:  
652 GCCCTCTGAACTTGCCTTAAA, shRNA targeting RBM39 #1:  
653 GCCGTGAAAGAAAGCGAAGTA, shRNA targeting RBM39 #2:  
654 GCTGGACCTATGAGGCTTTAT. Single gRNAs were cloned into LentiCRISPR 2.1 plasmid  
655 [57] by BsmBI (New England BioLabs) digestion and Gibson Assembly (New England

656 BioLabs); control sgRNA: ACGGAGGCTAAGCGTCGCAA, sgRNA targeting CDK2 #1:  
657 GTTCGTACTIONACCCATGG, sgRNA targeting CDK2 #2: CATGGGTGTAAGTACGAACG.  
658 For overexpression experiments pLX304-Blast-V5 were used, with either GFP or CDK2 (ID  
659 ccsbBroad304\_00276). Additionally, pCMV-GFP (Addgene #11153) and pCMV-CDK2[58]  
660 were used to transiently transfect the target cells.

661

## 662 **Lentiviral transduction**

663 Second generation lentivirus packaging system consisting of psPAX2 (Addgene #12260),  
664 pMD2.G (Addgene #12259) and pCMV-GFP as transfection control (Addgene #11153) was  
665 used to produce lentivirus particles. After transient transfection in HEK293T cells using  
666 polyetylenamine (PEI), lentiviral supernatant was filtered and used to infect target cells using  
667 8 mg/ml polybrene. After infection, the cells were selected with 2 mg/ml puromycin or 10  
668 mg/ml blasticidin. After 48-72h or until non-transduced control cells were dead, the selection  
669 was complete.

670

## 671 **RNA sequencing and GSEA**

672 Total RNA was extracted with RNeasy mini kit (Qiagen, cat# 74106) including a column  
673 DNase digestion (Qiagen, cat#79254), according to the manufacturer's instructions. Quality  
674 and quantity of total RNA was assessed by the 2100 Bioanalyzer using a Nano chip (Agilent,  
675 Santa Clara, CA). Total RNA samples having RIN>8 were subjected to library generation.  
676 Strand-specific libraries were generated using the TruSeq Stranded mRNA samples  
677 preparation kit (illumine Inc., San Diego, RS-122-2101/2) according to manufacturer's  
678 instructions (Illumina, part #15031047 Rev.E). Briefly, polyadenylated RNA from intact total  
679 RNA was purified using oligo-dT beads. Following purification, the RNA was fragmented,  
680 random primed and reverse transcribed using SuperScript II Reverse Transcriptase  
681 (Invitrogen, part # 18064-014) with the addition of Actinomycin D. Second strand synthesis  
682 was performed using Polymerase I and RNaseH with replacement of dTTP for dUTP. The  
683 generated cDNA fragments were 3' end adenylated and ligated to Illumina Paired-end

684 sequencing adapters and subsequently amplified by 12 cycles of PCR. The libraries were  
685 analyzed on a 2100 Bioanalyzer using a 7500 chip (Agilent, Santa Clara, CA), diluted and  
686 pooled equimolar into a multiplex sequencing pool. The libraries were sequenced with  
687 single-end 65bp reads on a HiSeq 2500 using V4 chemistry (Illumina inc., San Diego).  
688 For the analysis, reads were first aligned to a reference genome (hg38) and the datasets  
689 were normalized for sequence depth using a relative total size factor. We then performed  
690 gene set enrichment analysis (GSEA) using GSEA software[59] with log2FoldChange  
691 ranked list as an input. The GSEA preranked tool was used to run the analysis. We used two  
692 senescence gene signatures[2,38] as well as gene sets of genes upregulated in  
693 senescence from[39,40] to assess enrichment of senescence- associated genes (Table S1).

694

695 In genetic experiments we compared sgCDK2 cells treated with palbociclib with untreated  
696 cells and for pharmacological experiments cells treated with palbociclib and indisulam to  
697 untreated cells or single treatments. When using PF-0687360 we compared cells treated  
698 with the compound to untreated cells. All experiments were performed in duplicates. The *P*-  
699 value estimates the statistical significance of the enrichment score and is shown in the  
700 figure, unless  $P < 0.001$ .

701

## 702 **Splicing error quantification**

703 The RNA was isolated and libraries were prepared as described above. The libraries were  
704 sequenced with 75bp paired-end reads on a NextSeq550 using the High Output Kit v2.5,  
705 150 Cycles (Illumina Inc., San Diego). For the analysis, sequences were demultiplexed and  
706 adapter sequences were trimmed from using SeqPurge[60]. Trimmed reads were aligned to  
707 GRCh38 using Hisat2[61] using the prebuilt genome\_snp\_tran reference. Splice event  
708 detection was performed using rMats version 4.0.2 by comparing the replicates of the  
709 treated groups to the replicates of the untreated group[62]. rMats events in the different  
710 categories were considered significant when the following thresholds were met: having a

711 minimum of 10 reads, an FDR less than 10% and an inclusion-level-difference greater than  
712 10%, as described earlier[63].

713

#### 714 **Kinase enrichment analysis**

715 RNA-seq data generated from the splicing experiment was filtered for adjusted p-value <0.05  
716 and analysed using the Enrichr software[64] using kinase enrichment analysis[49].

717

#### 718 **CDK2 activity experiments**

719 CDK2 reporter DHB-iRFP was modified from DHB-Venus (Addgene #136461)[46]. Venus  
720 was replaced for iRFP713 through Gibson Assembly. In brief, iRFP713 was amplified adding  
721 sequence homology and assembled into the BamHI and HpaI sites of the original CDK2  
722 reporter plasmid. The following primers were used to amplify iRFP713;

723 F:ACCGATAATCAAGAACTGGATCCGGGGCCCAGGGCAGCGGCATGGCGGAAGGCTC

724 CGTC R:

725 GTTGATTATCGATAAGCTTGATCCCTCGATGCGGCCGCTTACTCTTCCATCACGCCGAT

726 C.

727 A549 cells were stably transduced with a lentiviral vector containing H2B-GFP (Addgene  
728 #25999) and a lentiviral vector containing DHB-iRFP, and subsequently GFP/iRFP double  
729 positive cells were isolated by FACS. In order to determine CDK2 activity following 24h drug  
730 treatment, cells were seeded in 96 well plate, treated with indisulam and palbociclib for 24h  
731 and then imaged on a spinning disc microscope using Andor 505 Dragonfly system  
732 equipped with 20x 0.75 NA objective and Zyla 4.2+, sCMOS camera. CDK2 activity was  
733 determined by calculating the nucleo/cytoplasmic ratio of the CDK2 reporter, using a custom  
734 macro for ImageJ, as described before [65]. For real-time analysis of CDK2 activity  
735 immediately following drug treatment, cells were seeded in chambered covered slides  
736 (LabtekII), and subsequently imaged for 25h. Inhibitors were added following the first round  
737 of image acquisition. Imaging was performed using a Deltavision Elite (Applied Precision)

738 that was maintained at 5% CO<sub>2</sub> and 37°C, equipped with a 20x 0.75 NA lens (Olympus) and  
739 cooled Hamamatsu ORCA R2 Black and White CCD-camera.

740

#### 741 **Flow cytometry**

742 A549 cells were treated for 24h with indicated doses of palbociclib and indisulam. Cells were  
743 then harvested, fixed in ice cold 70% ethanol and stained with DAPI 8 µg/ml in PBS.

744 Samples were acquired with LSRFortessa (BD Biosciences) and analysis was performed  
745 with FlowJo10 software. Single cells were gated via DAPI-A and DAPI-H signals and DNA  
746 content was gated based on DAPI-A histogram profile.

747

#### 748 **Western blot**

749 Cells were lysed using RIPA buffer and protein was extracted and quantified using BCA  
750 assay (Pierce). Loading buffer and reducing agent (both Thermo Fisher) were added to the  
751 samples, which were then boiled for 5 min at 95°C. The samples were resolved on a 5-15%  
752 Bis-Tris gel (Thermo Fisher) followed by blotting. Membranes were incubated with primary  
753 antibodies diluted to 1:1000 in 5% BSA. Secondary antibodies were used at 1:10000 dilution  
754 and were purchased from Biorad. Signal was visualized by the ECL solution (Biorad) using  
755 the ChemiDoc Imaging system (Biorad).

756

#### 757 **Kinase inhibition assay**

758 Inhibition of CDK/cyclin complexes by indisulam was measured by Z'LYTE - SelectScreen  
759 Kinase Profiling Services (ThermoFisher). Briefly, CDK/cyclin complexes were incubated  
760 with indisulam, substrates and ATP. The kinase activity of the CDK/cyclin complex was  
761 measured as ATP consumption, as described in detail previously[45].

762

#### 763 **Quantitative reverse transcription PCR**

764 RNA was extracted using Isolate II Mini kit (Bioline), following manufacturer's instructions.  
765 cDNA was generated using SensiFast cDNA synthesis kit (Bioline) following manufacturer's

766 instructions. For qPCR reaction 1 µg of cDNA was used with SensiFast Sybr Lo-Rox mix  
767 (Bioline) and respective primer pair. All reactions were performed in triplicates and the  
768 results were analyzed using the deltadelta Ct method. The sequences of primers used are  
769 as follows:  
770 *RPL13* forward GGCCAGCAGTACCTGTTTA, *RPL13* reverse AGATGGCGGAGGTGCAG,  
771 *RBM39* forward GTCGATGTTAGCTCAGTGCCTC, *RBM39* reverse  
772 ACGAAGCATATCTTCAGTTATG, *CCNH* forward TGTCGGTGTTTAAGCCAGCA, *CCNH*  
773 reverse TCCTGGGGTGATATTCCATTACT.

774

#### 775 **Senescence associated B-galactosidase staining**

776 Cells were stained using the Senescence Cells Histochemical Staining kit (CS0030) from  
777 Sigma Aldrich according to the manufacturer's instructions. Stained cells were imaged at  
778 100x magnification and at least 3 pictures per condition were taken.

779

#### 780 **Colony formation assay and proliferation assay**

781 Cells were plated in 6-well plates with densities between 10-40000 cells per well, depending  
782 on the cell line. Medium and drugs were refreshed every 3-4 days. After 10 days the cells  
783 were fixed with 4% formaldehyde (Millipore) in PBS, stained with 2% Crystal Violet (Sigma)  
784 in water and scanned. For proliferation assays, cells were plated in 96-well plates with  
785 densities between 500-2000 cells per well, depending on cell line. Plates were incubated at  
786 37°C and images were taken every 4 hours using the IncuCyte ® live cell imaging system.

787 Medium and drugs were refreshed every 3-4 days. Confluency was calculated to generate  
788 growth curves.

789

#### 790 **In vivo experiments**

791 All animal experiments were approved by the Animal Ethics Committee of the Netherlands  
792 Cancer Institute and were performed in accordance with institutional, national and European

793 guidelines for Animal Care and Use. CDK2 KO clones used *in vivo* were generated through  
794 transient transfection of a plasmid containing Cas9 and gRNA sequences, followed by the  
795 brief puromycin selection and characterisation of the clones. For the genetic experiments  
796 one million of CAL-51 CDK2 KO single cell clone or control cells in PBS were mixed 1:1 with  
797 matrigel and injected orthotopically in the mammary fat pad of 8 weeks female NMRI nude  
798 mice (JAX labs), 5-6 mice per group. Furthermore, one million of A549 CDK2 KO single cell  
799 clones or control cells in PBS were mixed 1:1 with matrigel and injected subcutaneously in  
800 the right flank of NMRI nude mice, 5-6 mice per group. Tumor volume was monitored twice a  
801 week and tumor volume was calculated based on the calliper measurements following  
802 modified ellipsoidal formula (tumor volume =  $\frac{1}{2}[\text{length} \times \text{width}^2]$ ). For the intervention  
803 experiment, one million of A549 cells in PBS were mixed 1:1 with matrigel and injected  
804 subcutaneously in the right flank of NMRI nude mice. Upon reaching 200 mm<sup>3</sup>, mice were  
805 randomized to four treatment groups of 8-12 mice per group: vehicle, indisulam, palbociclib  
806 or combination. Palbociclib (dissolved in 50 mM sodium lactate) was administered by oral  
807 gavage daily at 100 mg/kg and indisulam (dissolved in 3.5% DMSO, 6.5% Tween 80, 90%  
808 saline) by intraperitoneal injection three times per week at 5 mg/kg. Four mice were  
809 excluded from the study due to complications of daily intraperitoneal injections (peritonitis).  
810

### 811 **Immunohistochemistry**

812 Tumors were collected and fixed in EAF fixative (ethanol/acetic acid/formaldehyde/saline at  
813 40:5:10:45 v/v) and embedded in paraffin. For immunohistochemistry, 4 µm-thick sections  
814 were made on which antibodies against Ki67 and p21 were applied. The sections were  
815 reviewed with a Zeiss Axioskop2 Plus microscope (Carl Zeiss Microscopy) and images were  
816 captured with a Zeiss AxioCam HRc digital camera and processed with AxioVision 4  
817 software (both from Carl Zeiss Vision). Histological samples were analyzed by an  
818 experienced pathologist. Scoring was performed by quantifying positive area for Ki67 and H-  
819 score for p21.

820

821 **PK/PD experiment for PD and IN**

822 Blood was collected either from the tail vein or by cardiac puncture at different time points  
823 indicated in Supplementary Figure 4C and D. Samples were collected on ice using tubes  
824 with potassium EDTA as anticoagulant. After cooling, tubes were centrifuged for 10 min  
825 5000xg 4°C to separate the plasma fraction, which was then transferred into clean vials and  
826 stored at -20°C until analysis. Sample pre-treatment was accomplished by mixing 5µL  
827 (plasma) with 60 µL of formic acid in acetonitrile (1+99) containing the internal standard.  
828 After centrifugation, the clear supernatant was diluted 1+8 with water and 5µL was injected  
829 into the LC-MS/MS system. The samples were assayed twice by liquid chromatography  
830 triple quadrupole mass spectrometry (LC-MS/MS) using an API4000 detector (Sciex).  
831 Indisulam is detected in negative ionization mode (MRM: 384.2/171.9) and palbociclib in  
832 positive ionization mode (MRM: 448.5/320.0). In both cases, LC separation was achieved  
833 using a Zorbax Extend C18 column (100 x 2.0 mm: ID). Mobile phase A and B comprised  
834 0.1% formic acid in water and methanol, respectively. The flow rate was 0.4ml/min and a  
835 linear gradient from 20%B to 95%B in 2.5min, followed by 95%B for 2min, followed by re-  
836 equilibration at 20%B for 10min was used for elution.

837

838 **STATISTICAL ANALYSIS**

839 Unpaired t-test and ANOVA were performed with Graphpad Prism (v8.4.3).

840



841 **REFERENCES**

- 842 1. Ewald JA, Desotelle JA, Wilding G, Jarrard DF. Therapy-induced senescence in cancer.  
843 J Natl Cancer Inst. 2010;102: 1536–1546.
- 844 2. Fridman AL, Tainsky MA. Critical pathways in cellular senescence and immortalization  
845 revealed by gene expression profiling. *Oncogene*. 2008;27: 5975–5987.
- 846 3. Milanovic M, Fan DNY, Belenki D, Däbritz JHM, Zhao Z, Yu Y, et al. Senescence-  
847 associated reprogramming promotes cancer stemness. *Nature*. 2018. pp. 96–100.  
848 doi:10.1038/nature25167
- 849 4. Wang C, Vegna S, Jin H, Benedict B, Lieftink C, Ramirez C, et al. Inducing and  
850 exploiting vulnerabilities for the treatment of liver cancer. *Nature*. 2019;574: 268–272.
- 851 5. Guerrero A, Herranz N, Sun B, Wagner V, Gallage S, Guiho R, et al. Cardiac glycosides  
852 are broad-spectrum senolytics. *Nat Metab*. 2019;1: 1074–1088.
- 853 6. Saleh T, Bloukh S, Carpenter VJ, Alwohoush E, Bakeer J, Darwish S, et al. Therapy-  
854 Induced Senescence: An “Old” Friend Becomes the Enemy. *Cancers* . 2020;12: 822.
- 855 7. Guan X, LaPak KM, Hennessey RC, Yu CY, Shakya R, Zhang J, et al. Stromal  
856 Senescence By Prolonged CDK4/6 Inhibition Potentiates Tumor Growth. *Mol Cancer*  
857 *Res*. 2017;15: 237–249.
- 858 8. Muñoz-Espín D, Rovira M, Galiana I, Giménez C, Lozano-Torres B, Paez-Ribes M, et  
859 al. A versatile drug delivery system targeting senescent cells. *EMBO Mol Med*. 2018;10.  
860 doi:10.15252/emmm.201809355
- 861 9. Miettinen TP, Peltier J, Härtlova A, Gierliński M, Jansen VM, Trost M, et al. Thermal  
862 proteome profiling of breast cancer cells reveals proteasomal activation by CDK4/6  
863 inhibitor palbociclib. *EMBO J*. 2018;37. doi:10.15252/emboj.201798359
- 864 10. Torres-Guzmán R, Calsina B, Hermoso A, Baquero C, Alvarez B, Amat J, et al.  
865 Preclinical characterization of abemaciclib in hormone receptor positive breast cancer.  
866 *Oncotarget*. 2017;8: 69493–69507.
- 867 11. Iyengar M, O’Hayer P, Cole A, Sebastian T, Yang K, Coffman L, et al. CDK4/6 inhibition  
868 as maintenance and combination therapy for high grade serous ovarian cancer.  
869 *Oncotarget*. 2018;9: 15658–15672.
- 870 12. Malumbres M, Barbacid M. To cycle or not to cycle: a critical decision in cancer. *Nat*  
871 *Rev Cancer*. 2001;1: 222–231.
- 872 13. Sledge GW, Toi M, Neven P, Sohn J, Inoue K, Pivot X, et al. MONARCH 2: Abemaciclib  
873 in Combination With Fulvestrant in Women With HR+/HER2– Advanced Breast Cancer  
874 Who Had Progressed While Receiving Endocrine Therapy. *J Clin Orthod*. 2017;35:  
875 2875–2884.
- 876 14. Rugo HS, Diéras V, Gelmon KA, Finn RS, Slamon DJ, Martin M, et al. Impact of  
877 palbociclib plus letrozole on patient-reported health-related quality of life: results from  
878 the PALOMA-2 trial. *Ann Oncol*. 2018;29: 888–894.
- 879 15. Hortobagyi GN, Paluch-Shimon S, Petrakova K, Villanueva C, Chan A, Nusch A, et al.  
880 First-line ribociclib (RIB) + letrozole (LET) in hormone receptor-positive (HR+), HER2-  
881 negative (HER2–) advanced breast cancer (ABC): MONALEESA-2 biomarker analyses.

- 882 J Clin Orthod. 2018;36: 1022–1022.
- 883 16. Sherr CJ, Beach D, Shapiro GI. Targeting CDK4 and CDK6: From Discovery to  
884 Therapy. *Cancer Discov.* 2016;6: 353–367.
- 885 17. Schettini F, De Santo I, Rea CG, De Placido P, Formisano L, Giuliano M, et al. CDK 4/6  
886 Inhibitors as Single Agent in Advanced Solid Tumors. *Front Oncol.* 2018;8: 608.
- 887 18. Gopalan PK, Pinder MC, Chiappori A, Ivey AM, Villegas AG, Kaye FJ. A phase II clinical  
888 trial of the CDK 4/6 inhibitor palbociclib (PD 0332991) in previously treated, advanced  
889 non-small cell lung cancer (NSCLC) patients with inactivated CDKN2A. *Journal of*  
890 *Clinical Oncology.* 2014. pp. 8077–8077. doi:10.1200/jco.2014.32.15\_suppl.8077
- 891 19. Konecny GE, Wahner Hendrickson AE, Jatoi A, Burton JK, Paroly J, Glaspy JA, et al. A  
892 multicenter open-label phase II study of the efficacy and safety of palbociclib a cyclin-  
893 dependent kinases 4 and 6 inhibitor in patients with recurrent ovarian cancer. *J Clin*  
894 *Orthod.* 2016;34: 5557–5557.
- 895 20. Turner NC, Liu Y, Zhu Z, Loi S, Colleoni M, Loibl S, et al. Cyclin E1 Expression and  
896 Palbociclib Efficacy in Previously Treated Hormone Receptor-Positive Metastatic Breast  
897 Cancer. *J Clin Oncol.* 2019;37: 1169–1178.
- 898 21. Morris-Hanon O, Marazita MC, Romorini L, Isaja L, Fernandez-Espinosa DD, Sevlever  
899 GE, et al. Palbociclib Effectively Halts Proliferation but Fails to Induce Senescence in  
900 Patient-Derived Glioma Stem Cells. *Mol Neurobiol.* 2019;56: 7810–7821.
- 901 22. Fassel A, Brain C, Abu-Remaileh M, Stukan I, Butter D, Stepien P, et al. Increased  
902 lysosomal biomass is responsible for the resistance of triple-negative breast cancers to  
903 CDK4/6 inhibition. *Sci Adv.* 2020;6: eabb2210.
- 904 23. Haines E, Chen T, Kommajosyula N, Chen Z, Herter-Sprie GS, Cornell L, et al.  
905 Palbociclib resistance confers dependence on an FGFR-MAP kinase-mTOR-driven  
906 pathway in KRAS-mutant non-small cell lung cancer. *Oncotarget.* 2018;9: 31572–  
907 31589.
- 908 24. Herrera-Abreu MT, Palafox M, Asghar U, Rivas MA. Early adaptation and acquired  
909 resistance to CDK4/6 inhibition in estrogen receptor–positive breast cancer. *Cancer*  
910 *Res.* 2016. Available: <http://cancerres.aacrjournals.org/content/76/8/2301.short>
- 911 25. Vora SR, Juric D, Kim N, Mino-Kenudson M, Huynh T, Costa C, et al. CDK 4/6 inhibitors  
912 sensitize PIK3CA mutant breast cancer to PI3K inhibitors. *Cancer Cell.* 2014;26: 136–  
913 149.
- 914 26. Ruscetti M, Leibold J, Bott MJ, Fennell M. NK cell–mediated cytotoxicity contributes to  
915 tumor control by a cytostatic drug combination. 2018. Available:  
916 [https://science.sciencemag.org/content/362/6421/1416.abstract?casa\\_token=xqbhMa9r](https://science.sciencemag.org/content/362/6421/1416.abstract?casa_token=xqbhMa9rLysAAAAA:licKqq8A-eetp0IF500MdGNsn5Sru5wY1fpILa9ZFxJM_5iDyOXKOSmmRNv9zk6_mnnG_xLDzdZNNqU)  
917 [LysAAAAA:licKqq8A-](https://science.sciencemag.org/content/362/6421/1416.abstract?casa_token=xqbhMa9rLysAAAAA:licKqq8A-eetp0IF500MdGNsn5Sru5wY1fpILa9ZFxJM_5iDyOXKOSmmRNv9zk6_mnnG_xLDzdZNNqU)  
918 [eetp0IF500MdGNsn5Sru5wY1fpILa9ZFxJM\\_5iDyOXKOSmmRNv9zk6\\_mnnG\\_xLDzdZ](https://science.sciencemag.org/content/362/6421/1416.abstract?casa_token=xqbhMa9rLysAAAAA:licKqq8A-eetp0IF500MdGNsn5Sru5wY1fpILa9ZFxJM_5iDyOXKOSmmRNv9zk6_mnnG_xLDzdZNNqU)  
919 [NNqU](https://science.sciencemag.org/content/362/6421/1416.abstract?casa_token=xqbhMa9rLysAAAAA:licKqq8A-eetp0IF500MdGNsn5Sru5wY1fpILa9ZFxJM_5iDyOXKOSmmRNv9zk6_mnnG_xLDzdZNNqU)
- 920 27. Lee MS, Helms TL, Feng N, Gay J, Chang QE, Tian F, et al. Efficacy of the combination  
921 of MEK and CDK4/6 inhibitors in vitro and in vivo in KRAS mutant colorectal cancer  
922 models. *Oncotarget.* 2016;7: 39595–39608.
- 923 28. Haddad RI, Weinstein LJ, Wiczorek TJ, Bhattacharya N, Raftopoulos H, Oster MW, et  
924 al. A phase II clinical and pharmacodynamic study of E7070 in patients with metastatic,

- 925 recurrent, or refractory squamous cell carcinoma of the head and neck: modulation of  
926 retinoblastoma protein phosphorylation by a novel chloroindolyl sulfonamide cell cycle  
927 inhibitor. *Clin Cancer Res.* 2004;10: 4680–4687.
- 928 29. Smyth JF, Aamdal S, Awada A, Dittrich C, Caponigro F, Schöffski P, et al. Phase II  
929 study of E7070 in patients with metastatic melanoma. *Ann Oncol.* 2005;16: 158–161.
- 930 30. Talbot DC, von Pawel J, Cattell E, Murray Yule S, Johnston C, Zandvliet AS, et al. A  
931 Randomized Phase II Pharmacokinetic and Pharmacodynamic Study of Indisulam as  
932 Second-Line Therapy in Patients with Advanced Non–Small Cell Lung Cancer. *Clin*  
933 *Cancer Res.* 2007;13: 1816–1822.
- 934 31. Punt CJA, Fumoleau P, van de Walle B, Faber MN, Ravic M, Campone M. Phase I and  
935 pharmacokinetic study of E7070, a novel sulfonamide, given at a daily times five  
936 schedule in patients with solid tumors. A study by the EORTC-Early Clinical Studies  
937 Group (ECSG). *Annals of Oncology.* 2001. pp. 1289–1293.  
938 doi:10.1023/a:1012287111922
- 939 32. Raymond E, ten Bokkel Huinink WW, Taïeb J, Beijnen JH, Faivre S, Wanders J, et al.  
940 Phase I and pharmacokinetic study of E7070, a novel chloroindolyl sulfonamide cell-  
941 cycle inhibitor, administered as a one-hour infusion every three weeks in patients with  
942 advanced cancer. *J Clin Oncol.* 2002;20: 3508–3521.
- 943 33. Dittrich C, Dumez H, Calvert H, Hanauske A, Faber M, Wanders J, et al. Phase I and  
944 pharmacokinetic study of E7070, a chloroindolyl-sulfonamide anticancer agent,  
945 administered on a weekly schedule to patients with solid tumors. *Clin Cancer Res.*  
946 2003;9: 5195–5204.
- 947 34. Yamada Y, Yamamoto N, Shimoyama T, Horiike A, Fujisaka Y, Takayama K, et al.  
948 Phase I pharmacokinetic and pharmacogenomic study of E7070 administered once  
949 every 21 days. *Cancer Sci.* 2005;96: 721–728.
- 950 35. Han T, Goralski M, Gaskill N, Capota E, Kim J, Ting TC, et al. Anticancer sulfonamides  
951 target splicing by inducing RBM39 degradation via recruitment to DCAF15. *Science.*  
952 2017;356. doi:10.1126/science.aal3755
- 953 36. Prahallad A, Sun C, Huang S, Di Nicolantonio F, Salazar R, Zecchin D, et al.  
954 Unresponsiveness of colon cancer to BRAF(V600E) inhibition through feedback  
955 activation of EGFR. *Nature.* 2012;483: 100–103.
- 956 37. Gorgoulis V, Adams PD, Alimonti A, Bennett DC, Bischof O, Bishop C, et al. Cellular  
957 Senescence: Defining a Path Forward. *Cell.* 2019;179: 813–827.
- 958 38. Casella G, Munk R, Kim KM, Piao Y, De S, Abdelmohsen K, et al. Transcriptome  
959 signature of cellular senescence. *Nucleic Acids Res.* 2019;47: 11476.
- 960 39. Purcell M, Kruger A, Tainsky MA. Gene expression profiling of replicative and induced  
961 senescence. *Cell Cycle.* 2014;13: 3927–3937.
- 962 40. Hernandez-Segura A, de Jong TV, Melov S, Guryev V, Campisi J, Demaria M.  
963 Unmasking Transcriptional Heterogeneity in Senescent Cells. *Curr Biol.* 2017;27: 2652–  
964 2660.e4.
- 965 41. Tadesse S, Anshabo AT, Portman N, Lim E, Tilley W, Caldon CE, et al. Targeting CDK2  
966 in cancer: challenges and opportunities for therapy. *Drug Discov Today.* 2020;25: 406–  
967 413.

- 968 42. Fukuoka K, Usuda J, Iwamoto Y, Fukumoto H, Nakamura T, Yoneda T, et al.  
969 Mechanisms of action of the novel sulfonamide anticancer agent E7070 on cell cycle  
970 progression in human non-small cell lung cancer cells. *Invest New Drugs*. 2001;19:  
971 219–227.
- 972 43. Kumarasamy V, Vail P, Nambiar R, Witkiewicz AK, Knudsen ES. Functional  
973 Determinants of Cell Cycle Plasticity and Sensitivity to CDK4/6 Inhibition. *Cancer Res*.  
974 2021;81: 1347–1360.
- 975 44. Freeman-Cook K, Hoffman RL, Miller N, Almaden J, Chionis J, Zhang Q, et al.  
976 Expanding control of the tumor cell cycle with a CDK2/4/6 inhibitor. *Cancer Cell*.  
977 2021;39: 1404–1421.e11.
- 978 45. Hafner M, Mills CE, Subramanian K, Chen C, Chung M, Boswell SA, et al. Multiomics  
979 Profiling Establishes the Polypharmacology of FDA-Approved CDK4/6 Inhibitors and the  
980 Potential for Differential Clinical Activity. *Cell Chem Biol*. 2019;26: 1067–1080.e8.
- 981 46. Spencer SL, Cappell SD, Tsai F-C, Overton KW, Wang CL, Meyer T. The proliferation-  
982 quiescence decision is controlled by a bifurcation in CDK2 activity at mitotic exit. *Cell*.  
983 2013;155: 369–383.
- 984 47. Welcker M, Singer J, Loeb KR, Grim J, Bloecher A, Gurién-West M, et al. Multisite  
985 phosphorylation by Cdk2 and GSK3 controls cyclin E degradation. *Mol Cell*. 2003;12:  
986 381–392.
- 987 48. Clurman BE, Sheaff RJ, Thress K, Groudine M, Roberts JM. Turnover of cyclin E by the  
988 ubiquitin-proteasome pathway is regulated by cdk2 binding and cyclin phosphorylation.  
989 *Genes Dev*. 1996;10: 1979–1990.
- 990 49. Lachmann A, Ma'ayan A. KEA: kinase enrichment analysis. *Bioinformatics*. 2009;25:  
991 684–686.
- 992 50. Finn RS, Dering J, Conklin D, Kalous O, Cohen DJ, Desai AJ, et al. PD 0332991, a  
993 selective cyclin D kinase 4/6 inhibitor, preferentially inhibits proliferation of luminal  
994 estrogen receptor-positive human breast cancer cell lines in vitro. *Breast Cancer*  
995 *Research*. 2009. doi:10.1186/bcr2419
- 996 51. Mulero-Sánchez A, Pogacar Z, Vecchione L. Importance of genetic screens in precision  
997 oncology. *ESMO Open*. 2019;4: e000505.
- 998 52. Gong X, Litchfield LM, Webster Y, Chio L-C, Wong SS, Stewart TR, et al. Genomic  
999 Aberrations that Activate D-type Cyclins Are Associated with Enhanced Sensitivity to the  
1000 CDK4 and CDK6 Inhibitor Abemaciclib. *Cancer Cell*. 2017;32: 761–776.e6.
- 1001 53. Pandey K, Park N, Park K-S, Hur J, Cho YB, Kang M, et al. Combined CDK2 and  
1002 CDK4/6 Inhibition Overcomes Palbociclib Resistance in Breast Cancer by Enhancing  
1003 Senescence. *Cancers* . 2020;12. doi:10.3390/cancers12123566
- 1004 54. Simoneschi D, Rona G, Zhou N, Jeong Y-T, Jiang S, Milletti G, et al. CRL4AMBRA1 is a  
1005 master regulator of D-type cyclins. *Nature*. 2021. doi:10.1038/s41586-021-03445-y
- 1006 55. Ruscetti M, Morris JP 4th, Mezzadra R, Russell J, Leibold J, Romesser PB, et al.  
1007 Senescence-Induced Vascular Remodeling Creates Therapeutic Vulnerabilities in  
1008 Pancreas Cancer. *Cell*. 2020;181: 424–441.e21.
- 1009 56. Love MI, Huber W, Anders S. Moderated estimation of fold change and dispersion for

- 1010 RNA-seq data with DESeq2. *Genome Biol.* 2014;15: 550.
- 1011 57. Evers B, Jastrzebski K, Heijmans JPM, Grernrum W, Beijersbergen RL, Bernards R.  
1012 CRISPR knockout screening outperforms shRNA and CRISPRi in identifying essential  
1013 genes. *Nat Biotechnol.* 2016;34: 631–633.
- 1014 58. Beijersbergen RL, Carlée L, Kerkhoven RM, Bernards R. Regulation of the  
1015 retinoblastoma protein-related p107 by G1 cyclin complexes. *Genes Dev.* 1995;9:  
1016 1340–1353.
- 1017 59. Subramanian A, Tamayo P, Mootha VK, Mukherjee S, Ebert BL, Gillette MA, et al. Gene  
1018 set enrichment analysis: a knowledge-based approach for interpreting genome-wide  
1019 expression profiles. *Proc Natl Acad Sci U S A.* 2005;102: 15545–15550.
- 1020 60. Sturm M, Schroeder C, Bauer P. SeqPurge: highly-sensitive adapter trimming for  
1021 paired-end NGS data. *BMC Bioinformatics.* 2016;17: 208.
- 1022 61. Kim D, Paggi JM, Park C, Bennett C, Salzberg SL. Graph-based genome alignment and  
1023 genotyping with HISAT2 and HISAT-genotype. *Nat Biotechnol.* 2019;37: 907–915.
- 1024 62. Shen S, Park JW, Lu Z-X, Lin L, Henry MD, Wu YN, et al. rMATS: robust and flexible  
1025 detection of differential alternative splicing from replicate RNA-Seq data. *Proc Natl Acad  
1026 Sci U S A.* 2014;111: E5593–601.
- 1027 63. Wang E, Lu SX, Pastore A, Chen X, Imig J, Chun-Wei Lee S, et al. Targeting an RNA-  
1028 Binding Protein Network in Acute Myeloid Leukemia. *Cancer Cell.* 2019;35: 369–384.e7.
- 1029 64. Chen EY, Tan CM, Kou Y, Duan Q, Wang Z, Meirelles GV, et al. Enrichr: interactive and  
1030 collaborative HTML5 gene list enrichment analysis tool. *BMC Bioinformatics.* 2013;14:  
1031 128.
- 1032 65. Menegakis A, Klompmaker R, Vennin C, Arbusà A, Damen M, van den Broek B, et al.  
1033 Resistance of Hypoxic Cells to Ionizing Radiation Is Mediated in Part via Hypoxia-  
1034 Induced Quiescence. *Cells.* 2021;10. doi:10.3390/cells10030610
- 1035

Figure 1

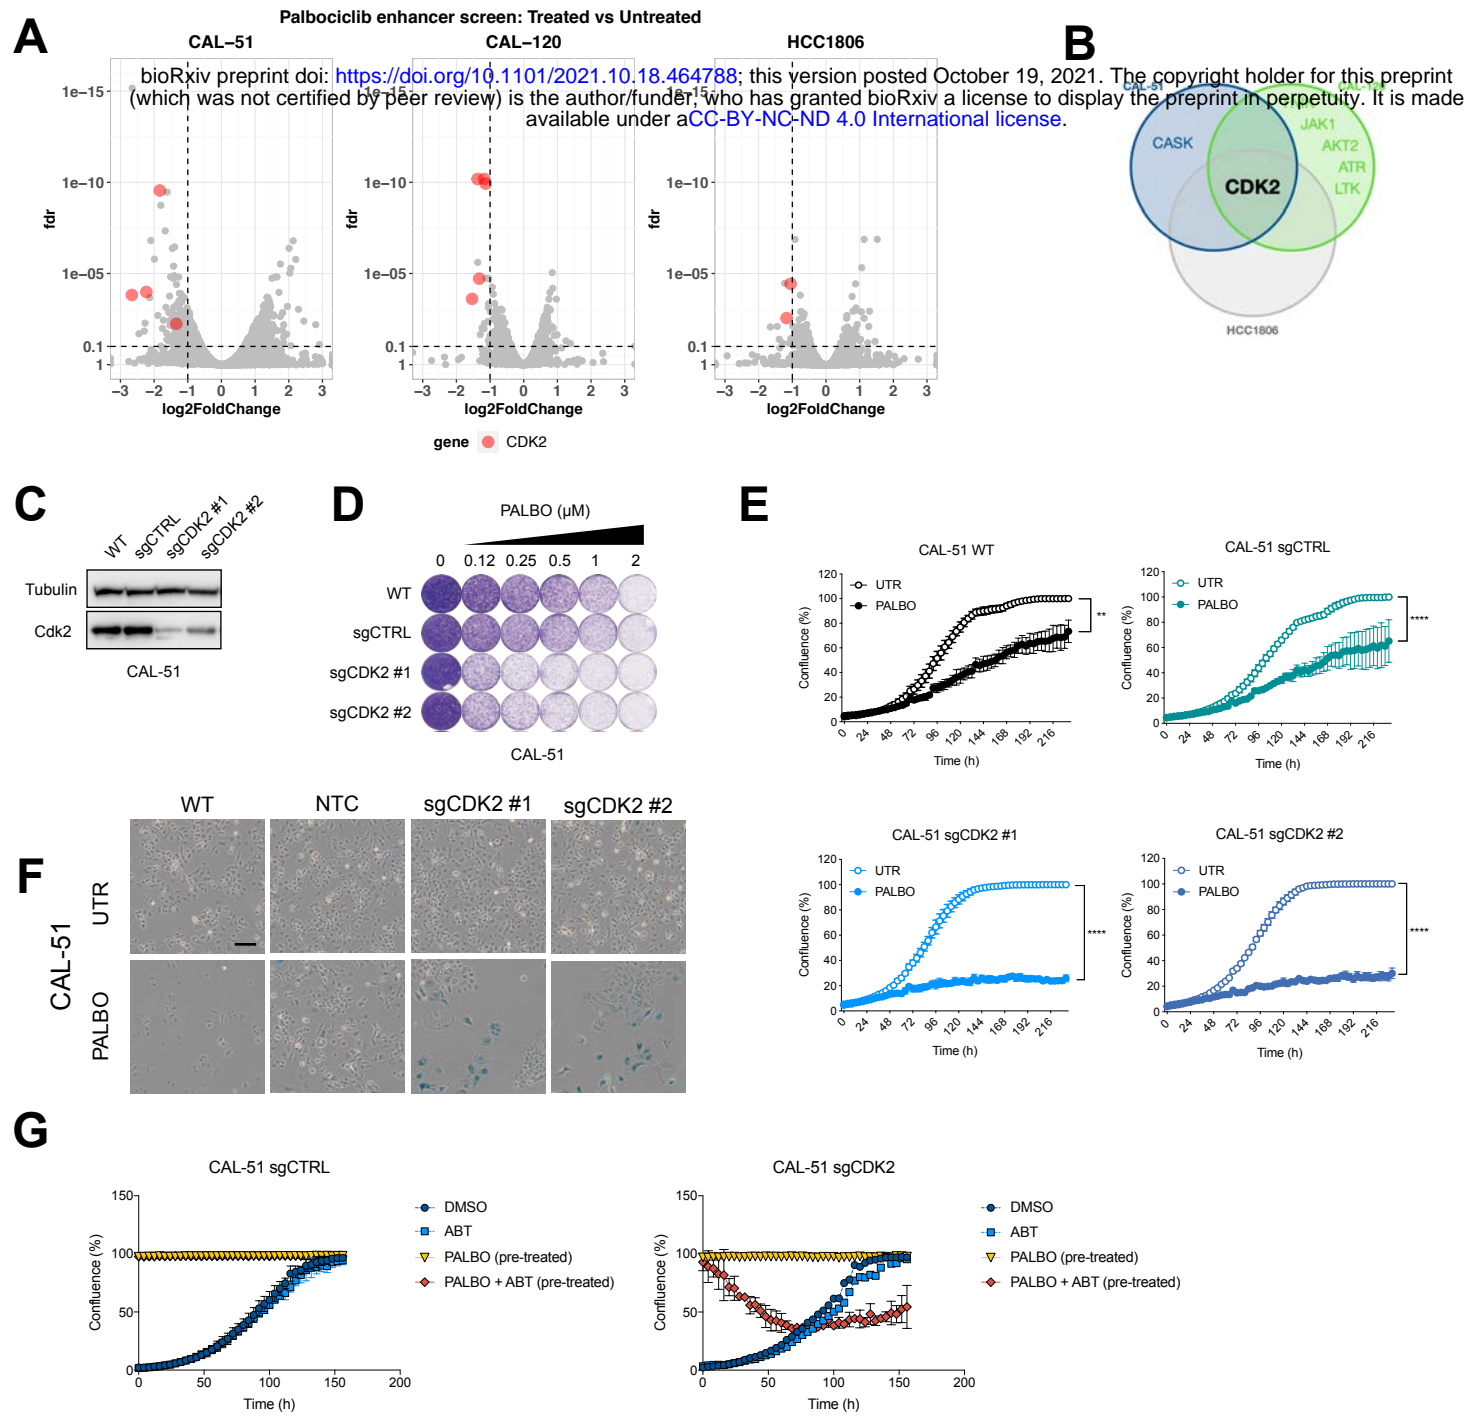

Figure 2

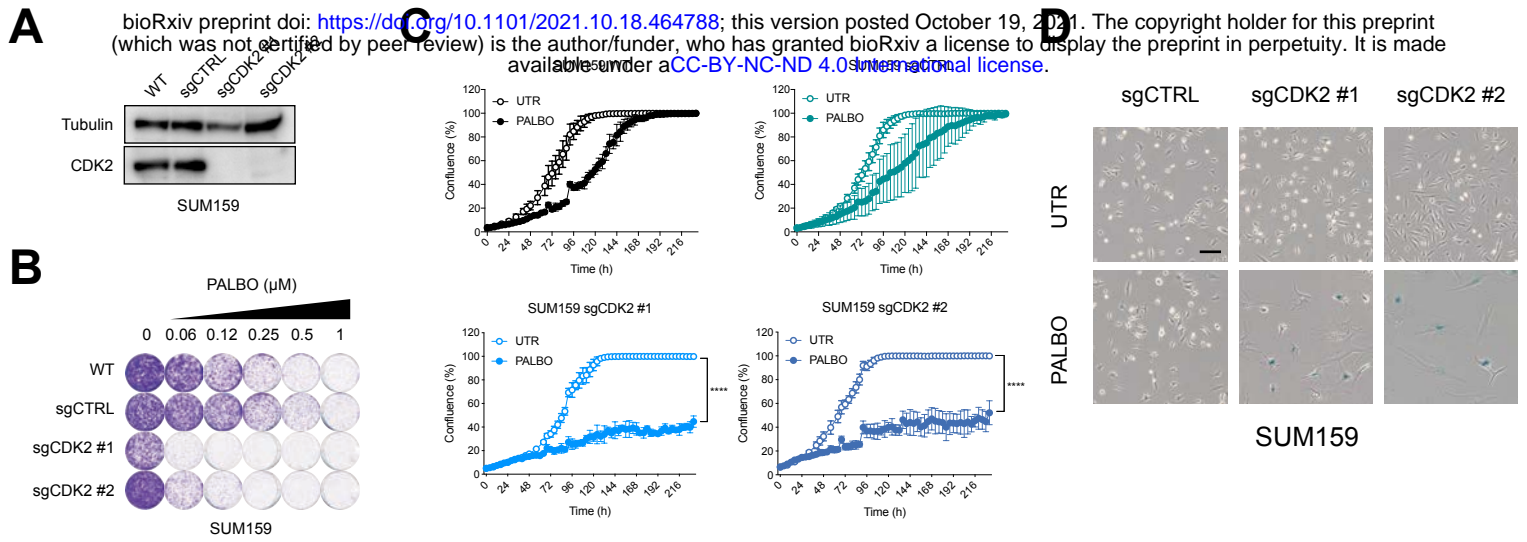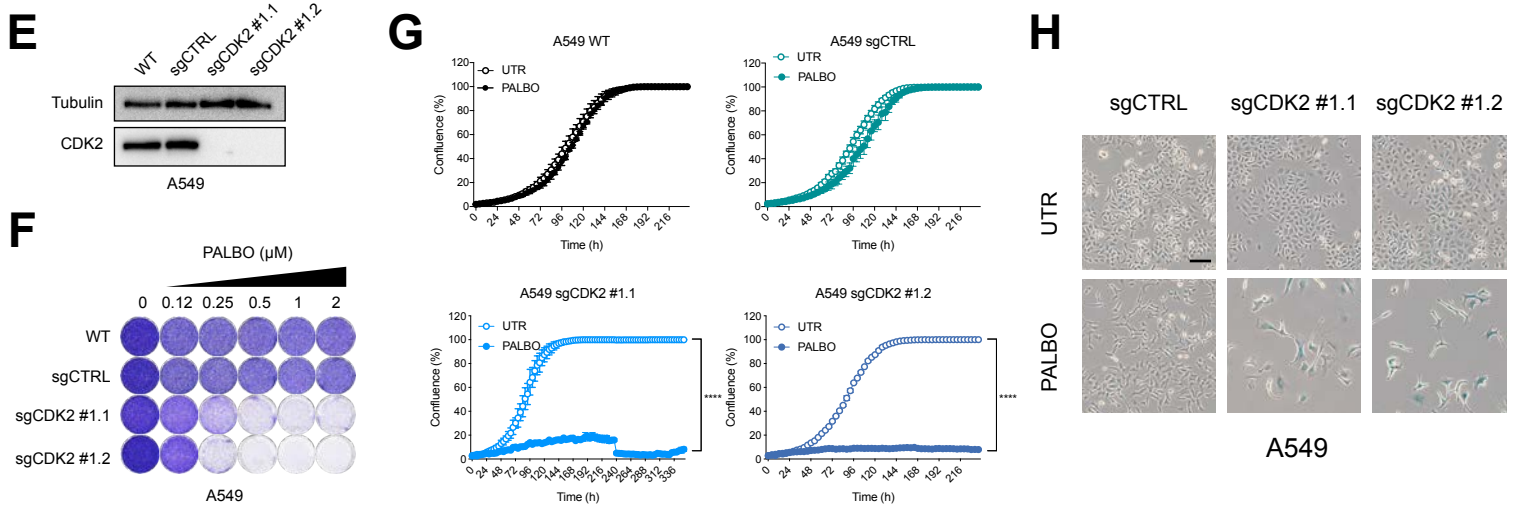

**I** Senescence signatures in A549 (sgCDK2 + PALBO vs. sgCDK2)

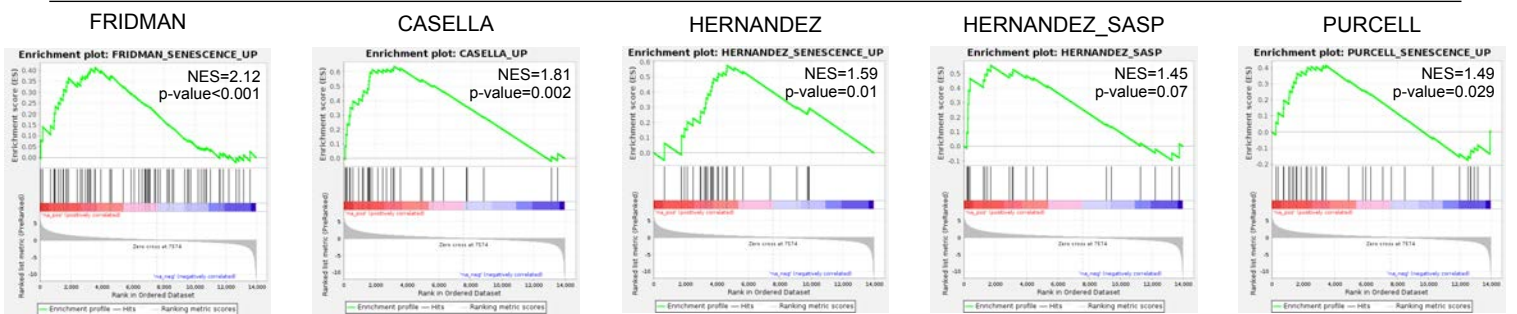

Figure 3

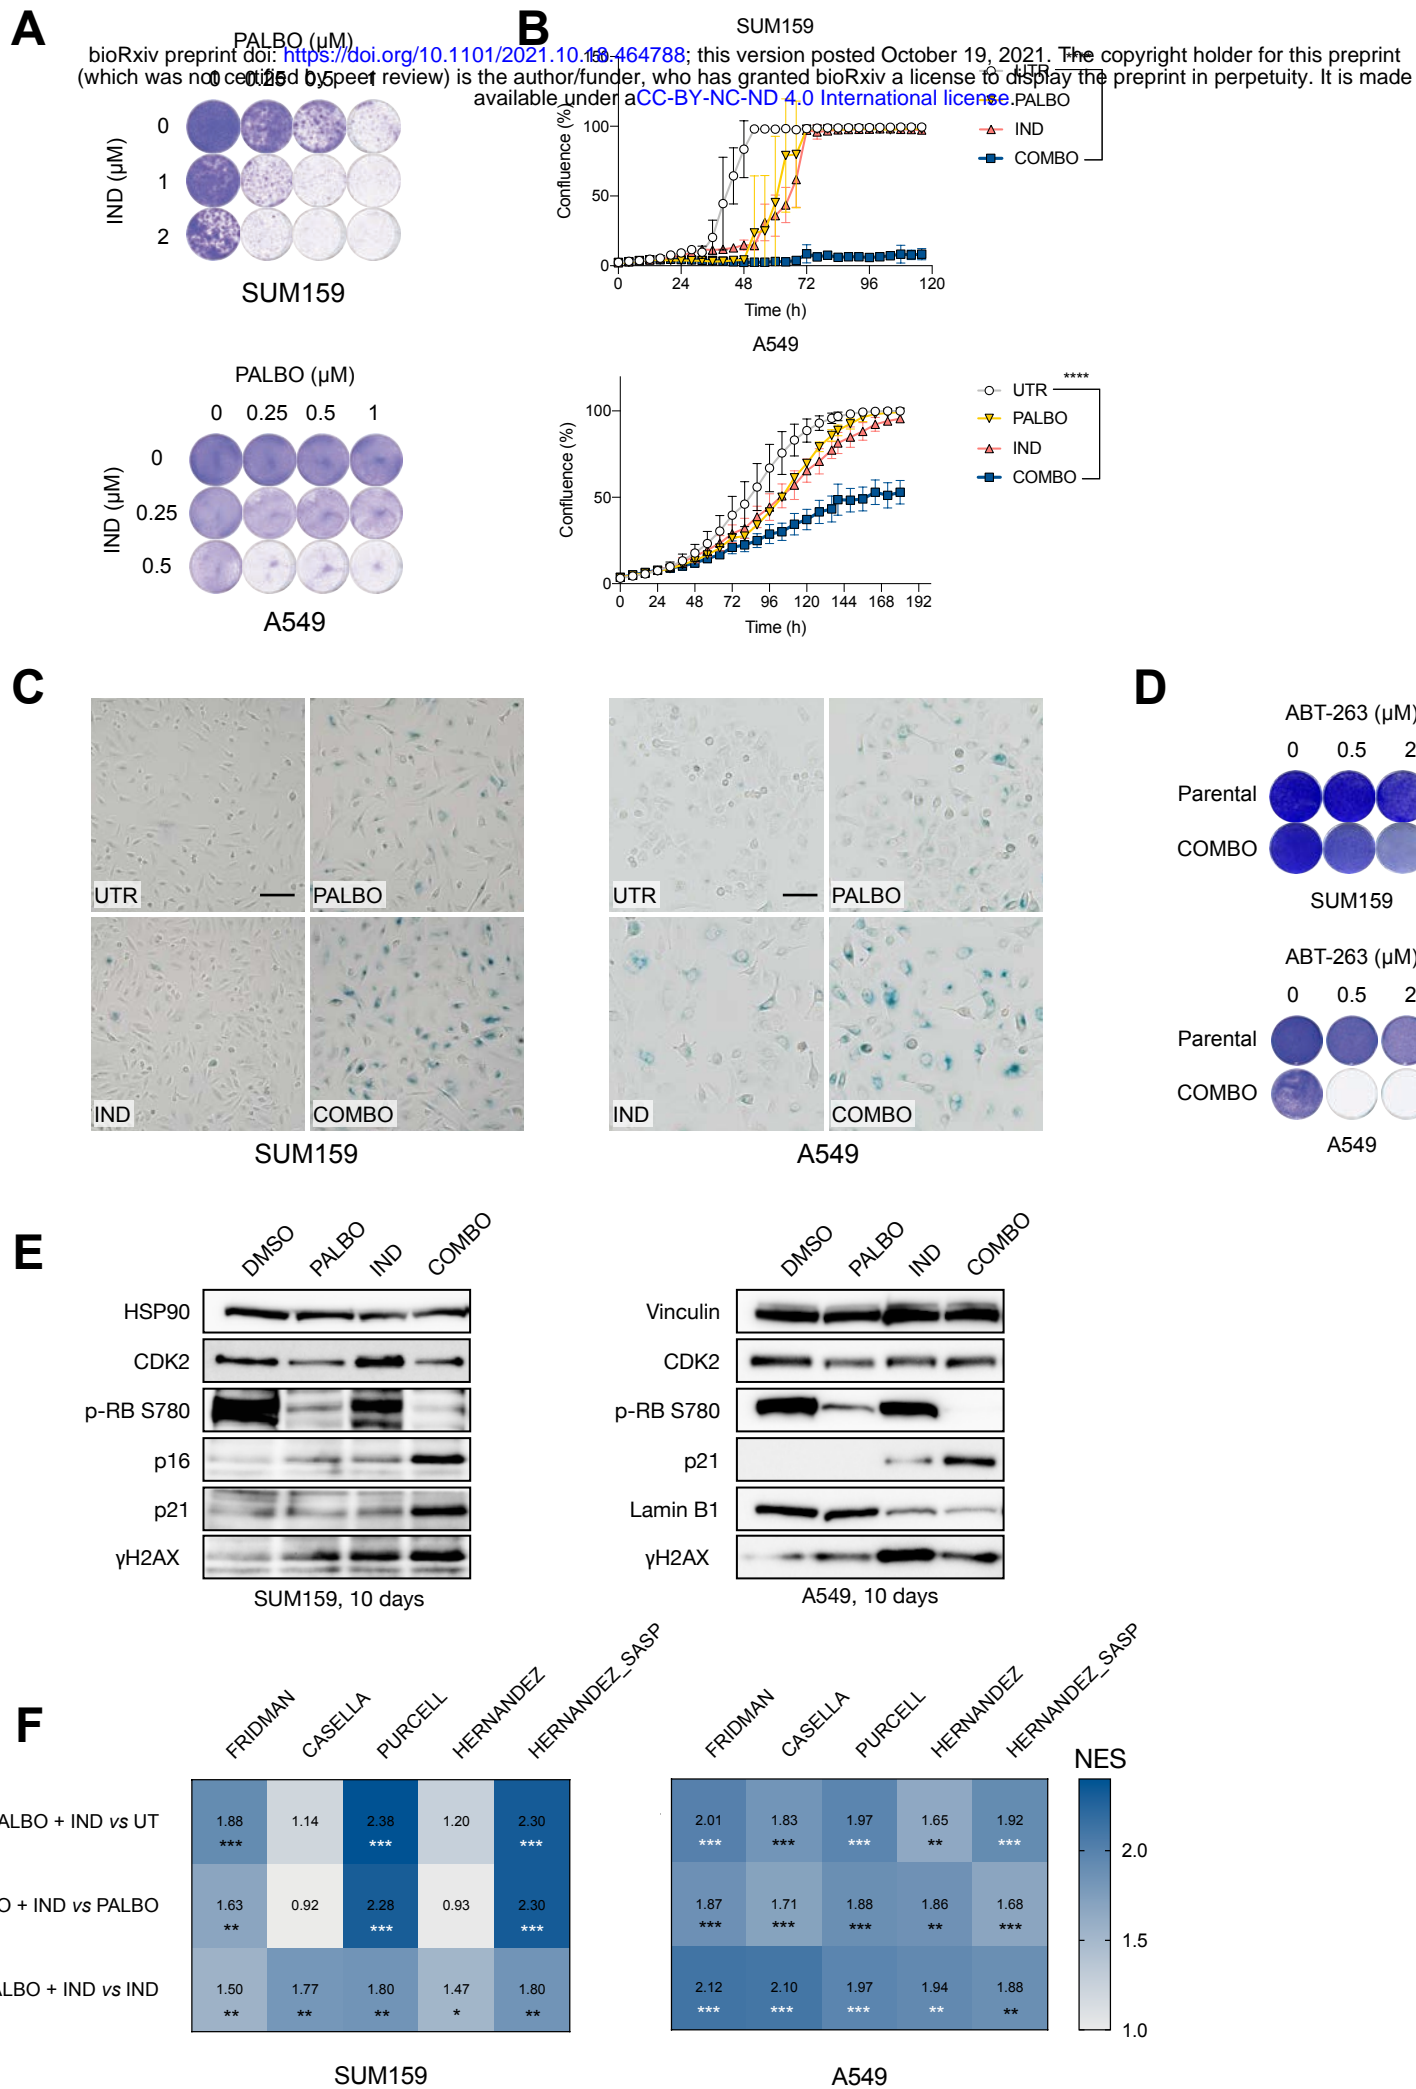



Figure 4

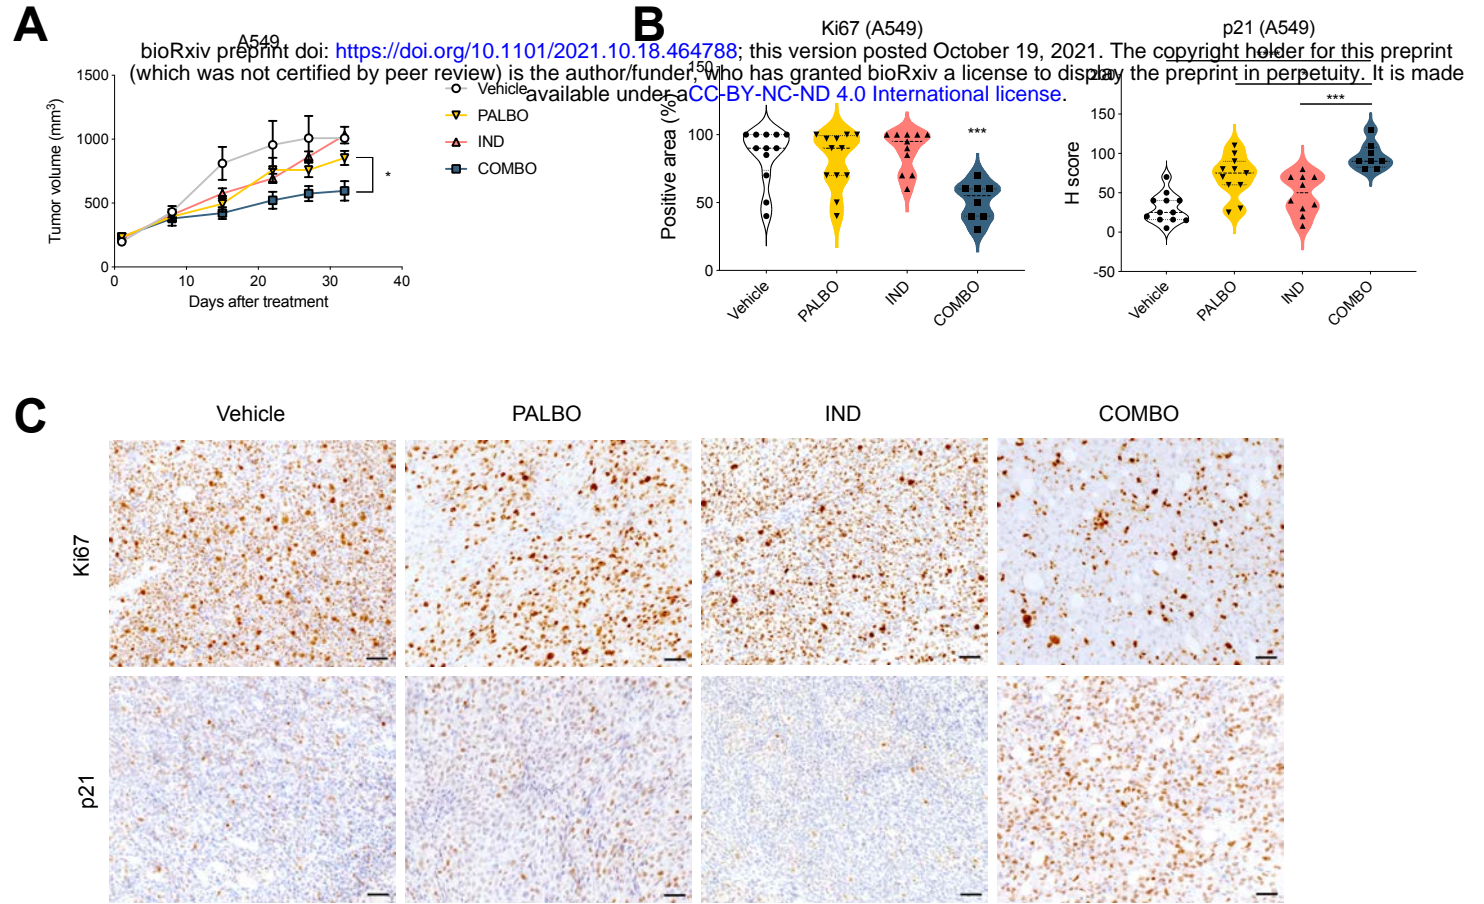

Figure 5

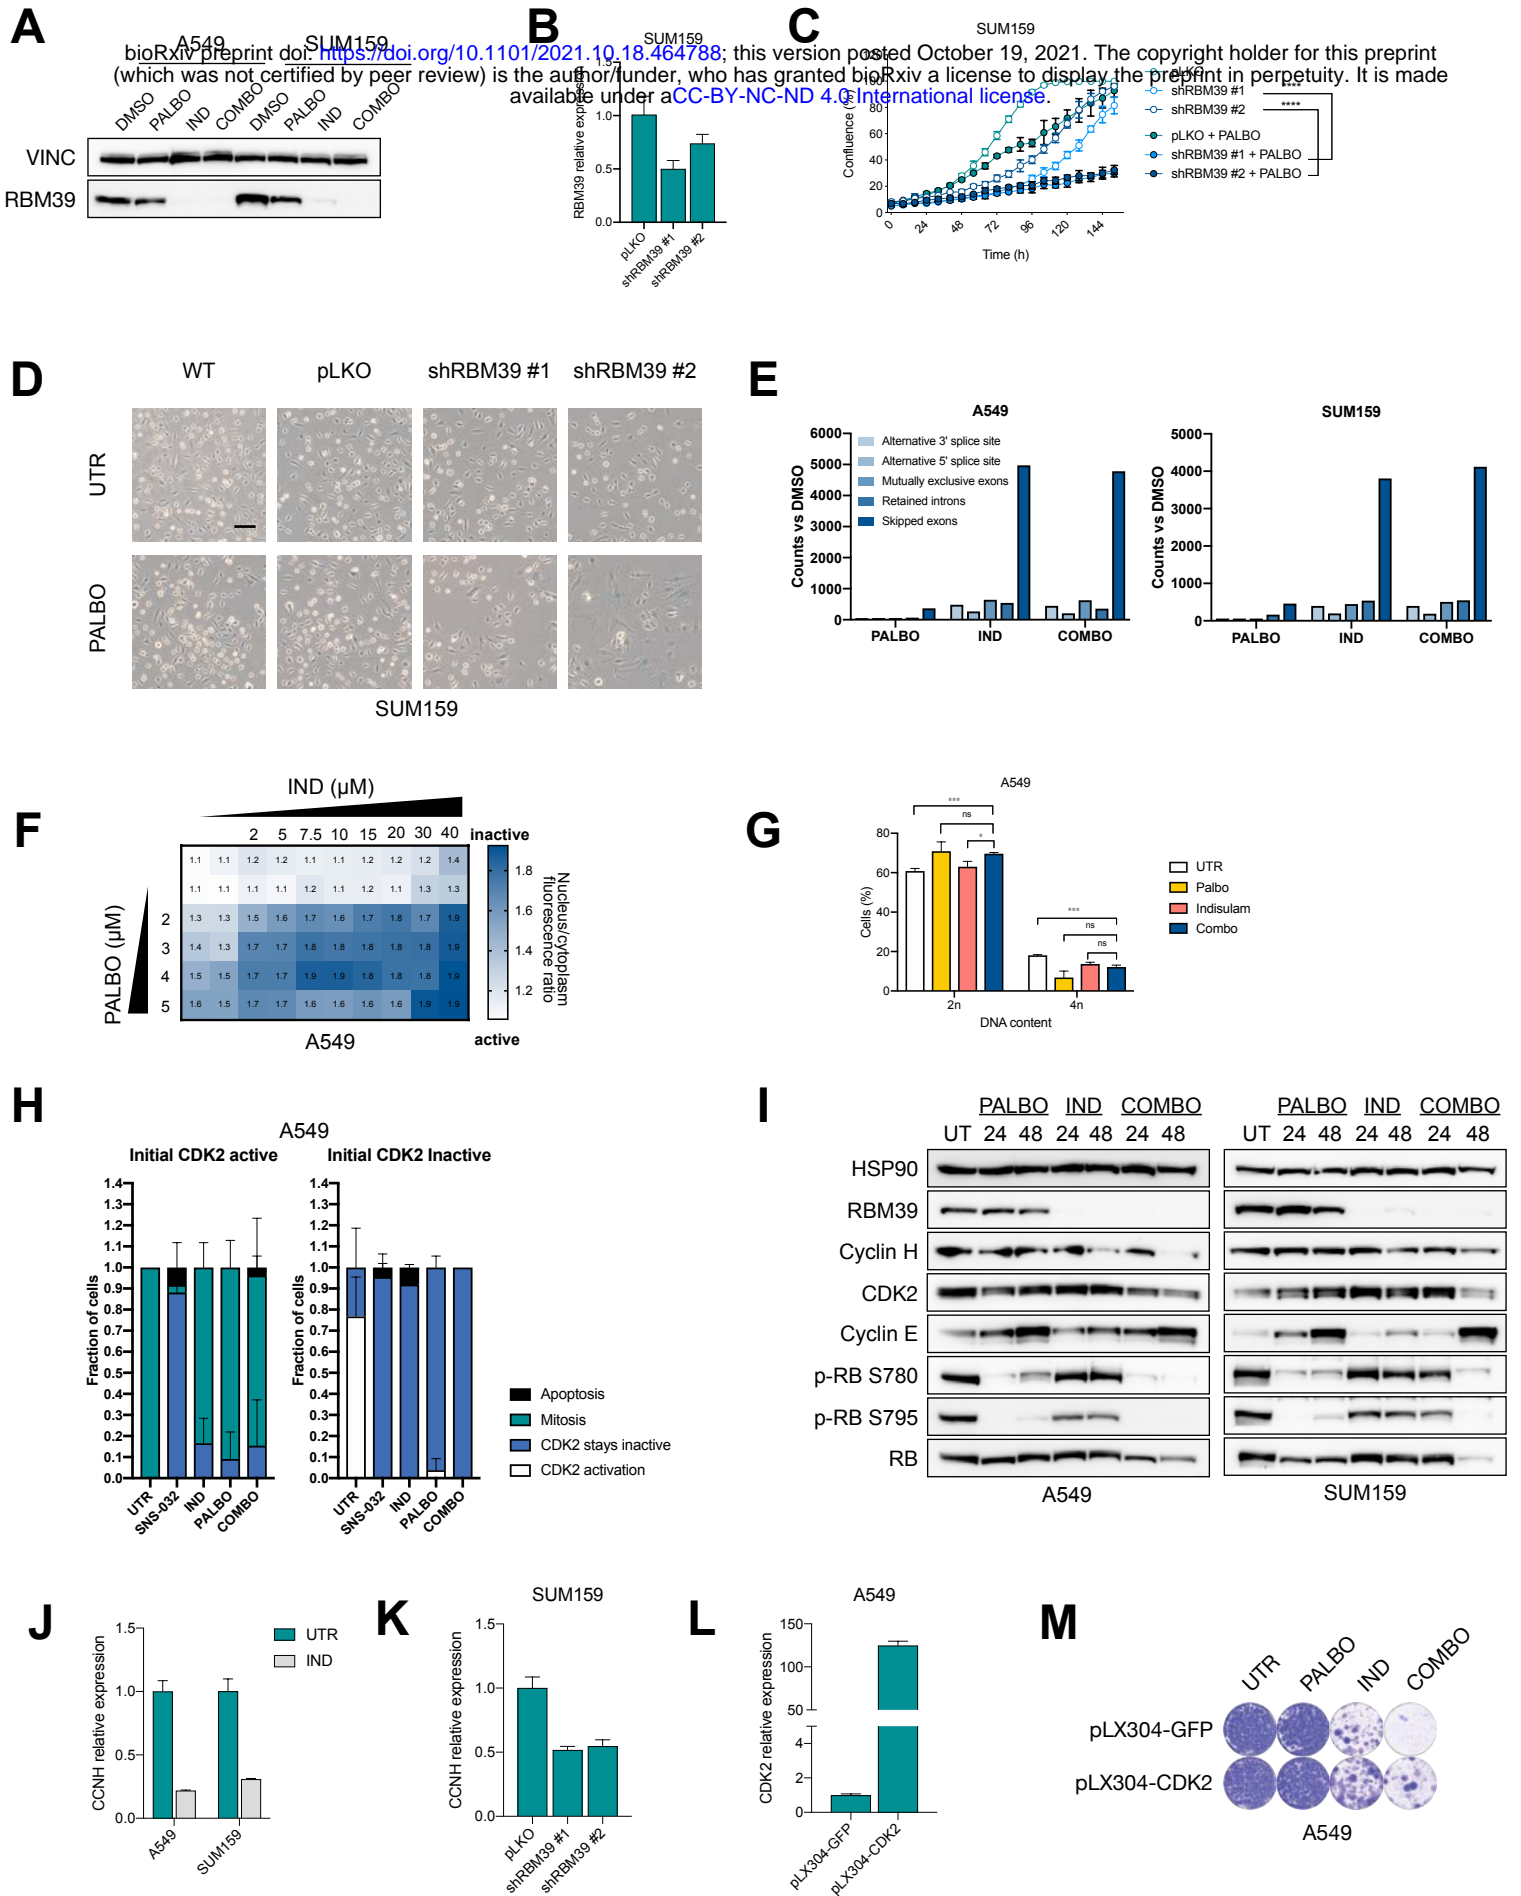

Source: http://biorxiv.org/content/10.1101/2021.10.18.464788v1.full.pdf
